# 1 Systematic Comparison of High-throughput Single-Cell and 2 Single-Nucleus Transcriptomes during Cardiomyocyte 3 Differentiation

4  
5 Alan Selewa<sup>1,4</sup>, Ryan Dohn<sup>1</sup>, Heather Eckart<sup>1</sup>, Stephanie Lozano<sup>1</sup>, Bingqing Xie<sup>1</sup>, Eric  
6 Gauchat<sup>1,4</sup>, Reem Elorbany<sup>2</sup>, Katherine Rhodes<sup>2</sup>, Jonathan Burnett<sup>2</sup>, Yoav Gilad<sup>1,2</sup>, Sebastian  
7 Pott<sup>2\*</sup>, Anindita Basu<sup>1,3\*</sup>

8  
9 <sup>1</sup> Department of Medicine, University of Chicago

10 <sup>2</sup> Department of Human Genetics, University of Chicago

11 <sup>3</sup> Center for Nanoscale Materials, Argonne National Laboratory

12 <sup>4</sup> Biophysical Sciences Graduate Program, University of Chicago

13  
14 \* Correspondence: Sebastian Pott (spott@uchicago) and Anindita Basu (onibas@uchicago.edu)

## 17 ABSTRACT

18  
19 A comprehensive reference map of all cell types in the human body is necessary for improving our  
20 understanding of fundamental biological processes and in diagnosing and treating disease. High-  
21 throughput single-cell RNA sequencing techniques have emerged as powerful tools to identify and  
22 characterize cell types in complex and heterogeneous tissues. However, extracting intact cells from  
23 tissues and organs is often technically challenging or impossible, for example in heart or brain  
24 tissue. Single-nucleus RNA sequencing provides an alternative way to obtain transcriptome  
25 profiles of such tissues. To systematically assess the differences between high-throughput single-  
26 cell and single-nuclei RNA-seq approaches, we compared Drop-seq and DroNc-seq, two  
27 microfluidic-based 3' RNA capture technologies that profile total cellular and nuclear RNA,  
28 respectively, during a time course experiment of human induced pluripotent stem cells (iPSCs)  
29 differentiating into cardiomyocytes. Clustering of time-series transcriptomes from Drop-seq and  
30 DroNc-seq revealed six distinct cell types, five of which were found in both techniques.  
31 Furthermore, single-cell trajectories reconstructed from both techniques reproduced expected  
32 differentiation dynamics. We then applied DroNc-seq to *postmortem* heart tissue to test its  
33 performance on heterogeneous human tissue samples. We compared the detected cell types from  
34 primary tissue with iPSC-derived cardiomyocytes profiled with DroNc-seq. Our data confirm that  
35 DroNc-seq yields similar results to Drop-seq on matched samples and can be successfully used to  
36 generate reference maps for the human cell atlas.

## 38 Introduction

39  
40 The identification and characterization of cell types from solid tissues and organs in the human  
41 body is the necessary basis for a comprehensive reference map of all human cells<sup>1</sup>. Such tissue  
42 atlases will provide a basis for understanding fundamental biological processes and to diagnose  
43 and treat disease. Single-cell RNA-sequencing (scRNA-seq) has emerged as a key tool to  
44 decompose complex tissues into cell types and states, and to investigate cellular heterogeneity<sup>2-5</sup>.  
45 Profiling cellular heterogeneity using thousands of cells and creating tissue level cellular maps  
46 require efficient and scalable scRNA-seq protocols. The development of microfluidic droplet-

47 based approaches, such as Drop-seq, has enabled transcriptional profiling of thousands of cells in  
48 parallel<sup>5,6</sup>. Drop-seq has been used to characterize the cellular composition of a wide variety of  
49 tissues and organisms, including the mouse retina<sup>5</sup>, malaria parasites<sup>7</sup>, and drosophila embryos<sup>8</sup>.  
50 However, Drop-seq requires suspensions of intact single cells for library preparation which cannot  
51 be obtained for many tissues and cell types because of extra-cellular matrix that may be hard to  
52 digest, fragile cell membranes, unusual cell morphology, or large cell-size. This challenge may be  
53 addressed by adapting Drop-seq to single nuclei RNA-seq (DroNc-seq<sup>9</sup>). DroNc-seq obtains gene  
54 expression profiles from isolated nuclei which are more amenable for direct dissociation from  
55 tissues while maintaining membrane integrity. Both approaches can be used to characterize cellular  
56 composition of complex tissues. Comparisons of low-throughput, high-coverage single cell and  
57 single nucleus approaches suggest that both methods capture the cellular composition of  
58 heterogeneous samples to a similar degree<sup>10,11</sup>. However, direct comparisons of Drop-seq and  
59 DroNc-seq on matched samples have been limited to cell lines<sup>9</sup> and, more recently, samples from  
60 mouse kidneys<sup>12</sup>. To establish a firm understanding of the differences and similarities of Drop-seq  
61 and DroNc-seq, it is necessary to compare these technologies across a spectrum of different  
62 biological conditions. A crucial aspect of single cell RNA-seq approaches is to capture cellular  
63 heterogeneity associated with expression changes during dynamic processes, for example during  
64 differentiation. We performed a systematic comparison of Drop-seq and DroNc-seq using time-  
65 course data from human iPSCs differentiating into cardiomyocytes (CMs). This allowed us to  
66 compare Drop-seq and DroNc-seq with respect to read depth, transcriptome composition, cell  
67 types detected, and cellular differentiation trajectories. These assessments are important for  
68 integrative analyses and interpretation of data produced using high-throughput single-cell and  
69 single-nucleus RNA-seq in general, and with Drop-seq and DroNc-seq in particular. In addition,  
70 we confirmed that inclusion of reads from intronic regions increases the sensitivity of DroNc-seq  
71 and improves resolution in identifying cell types. Next, we applied DroNc-seq to frozen  
72 *postmortem* human heart tissue to sample constituent cell types and compare them to CMs grown  
73 *in vitro* from human iPSC. This work was conceived as part of benchmarking experiments to  
74 establish the applicability of recent high-throughput single-nucleus RNA-seq for the Human Cell  
75 Atlas (HCA)<sup>1</sup>. By identifying differences and similarities between Drop-seq and DroNc-seq, this  
76 study will aid efforts such as the HCA that require the integration of single-cell and single-nucleus  
77 RNA-seq data from various tissues and laboratories into a common platform.

78

## 79 **Results**

80

81 To quantitatively assess the similarities and differences in transcription profiles from single-cell  
82 and single-nucleus RNA-seq, we performed Drop-seq and DroNc-seq, respectively, on cells  
83 undergoing iPSC to CM differentiation, following an established protocol<sup>13</sup>. To compare Drop-  
84 seq and DroNc-seq across samples with different cellular characteristics and degrees of  
85 heterogeneity, we collected cells from multiple time-points throughout the differentiation process  
86 (days 0, 1, 3, 7, and 15) (Figure 1A). For each technique, we obtained samples from two cell lines  
87 per time-point, except for time-point day 15 which contains cells from a single cell line. DroNc-  
88 seq also contains a single cell line for day 1. To approximate how many cell barcodes were  
89 accidentally associated with 2 cells in our experiment (doublet rate), we mixed iPSCs from chimp  
90 into the Drop-seq run from cell line 1 on day 7. These data confirmed a low doublet rate (<5%)  
91 (Figure S1). The distributions of number of genes for each day of differentiation are shown in  
92 Figure 1B. Overall, Drop-seq shows a higher number of genes and transcripts detected compared  
93 with DroNc-seq, reflecting the greater abundance of transcripts in the intact cell, compared with  
94 the nucleus alone. For our analyses, we selected cells and nuclei with at least 400 and 300 detected

95 genes (at least 1 UMI), respectively, and removed chimp cells from the day 7 sample. After  
 96 filtering, the mean number of genes detected per cell and per nucleus are 962 and 553, and the  
 97 mean number of UMI per cell, nucleus are 1474 and 721 for Drop-seq and DroNc-seq, respectively.  
 98 Based on the above cut-offs, we detected a total of 25,475 cells and 17,229 nuclei across all cell  
 99 lines and time-points for Drop-seq and DroNc-seq, respectively. Both cell lines were present at  
 100 each time-point in the filtered datasets (Figure 1C). Using raw RNA-seq reads, we found that top  
 101 expressed genes in Drop-seq comprised of mitochondrial and ribosomal genes, while the top gene  
 102 in DroNc-seq was the non-coding RNA, MALAT1 (Figure 1D).

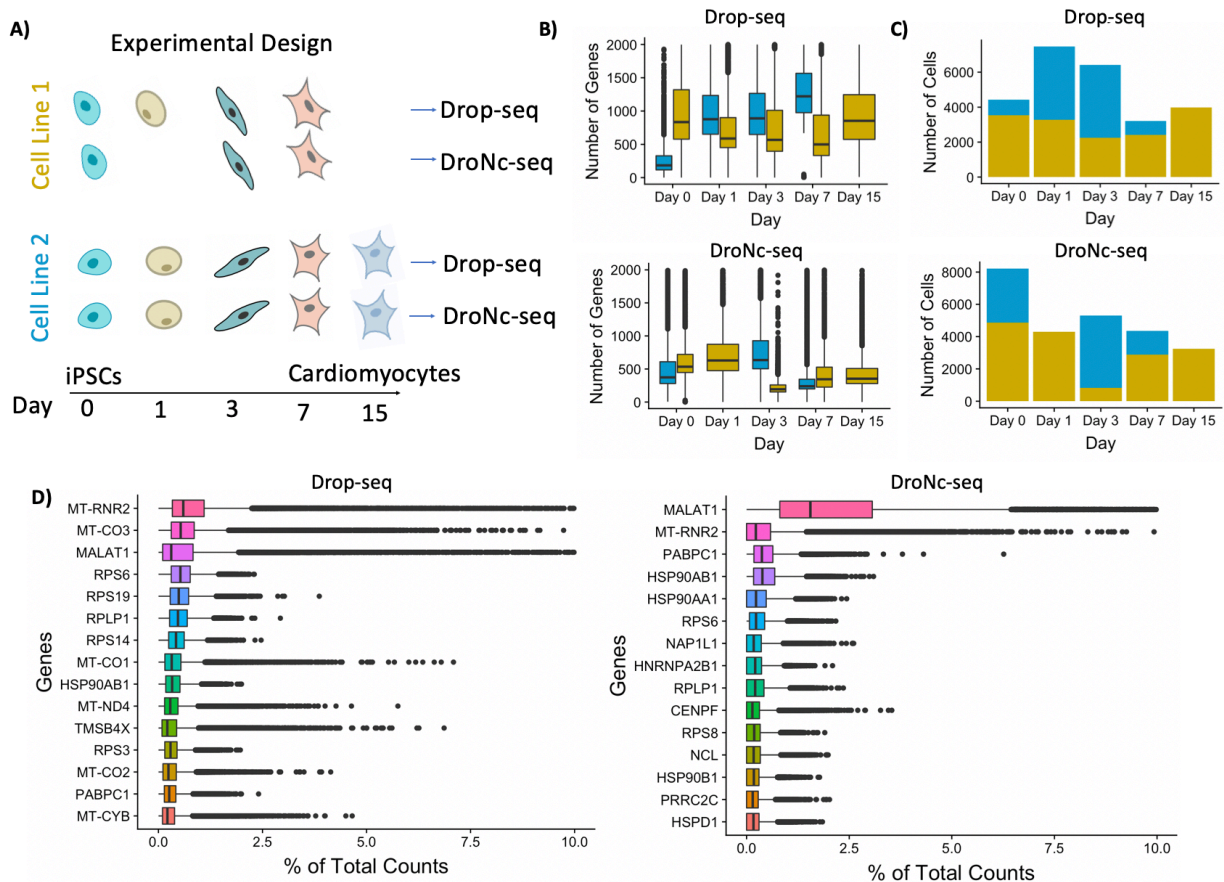

103  
 104 Figure 1: Experimental design and preliminary data analyses. A) Two cell lines of iPSCs differentiating into CMs  
 105 over a 15-day time period underwent mRNA sequencing with Drop-seq and DroNc-seq. B) Boxplots showing the  
 106 distribution of number of genes in each day and cell line for Drop-seq (top) and DroNc-seq (bottom). C) Number of  
 107 cells present after applying quality control cut-offs. D) Percentage of counts for the top 15 genes in Drop-seq (left)  
 108 and DroNc-seq (right).

109  
 110 In addition to the differences in the number of genes detected in Drop-seq and DroNc-seq, DroNc-  
 111 seq captures a significantly higher fraction of intronic reads compared with Drop-seq (Figure 2A).  
 112 Up to 50% of the reads from DroNc-seq mapped to intronic regions, while for Drop-seq, only 7%  
 113 of reads were intronic. This discrepancy between the two techniques is expected and likely caused  
 114 by the sampling of unprocessed transcripts that are enriched in the nucleus. Intronic reads will be  
 115 detected if the transcript was not fully processed before capture by the polydT primer. In addition,  
 116 internal priming<sup>14</sup> on polyA stretches might lead to further sampling of introns. In order to  
 117 understand the sources of intronic reads in our dataset, we scanned the genome for polyA stretches  
 118 that are at least 5 bp long, and counted their frequency within and around each read with 20 bp  
 119 flanking regions. We found that approximately 40% of the intronic reads and their 20-bp flanking

120 regions contained at least one polyA stretches and that these polyA stretches were specifically  
 121 enriched towards the 3' end of reads (Figure S3). This suggests internal priming as a contributing  
 122 mechanism for intronic read sampling. RNA-seq reads aligning to introns have been used to  
 123 quantify gene expression levels previously<sup>11,12</sup>. Indeed, incorporating intronic reads to quantify  
 124 gene expression level improves the gene detection rate in DroNc-seq by ~2 times on average  
 125 (Figure 2B). This increase in detection rate leads to recovery of gene expression for cells which  
 126 would otherwise not be detected, as demonstrated by examples from mesoderm and cardiac genes  
 127 (Figure 2C). These data suggest that inclusion of introns can be used to compensate for the smaller  
 128 amount of nuclear RNA compared with whole cells. Accordingly, we incorporated intronic reads  
 129 into our analysis pipeline to improve gene detection rates in DroNc-seq. After intron inclusion, we  
 130 recovered 1.5 times more nuclei, bringing our total to 25,429 nuclei using a minimum of 300 genes  
 131 detected per nucleus. In addition, the mean number of UMI per cell increased from 721 to 918,  
 132 while the mean number of genes detected per cell increased from 553 to 672.

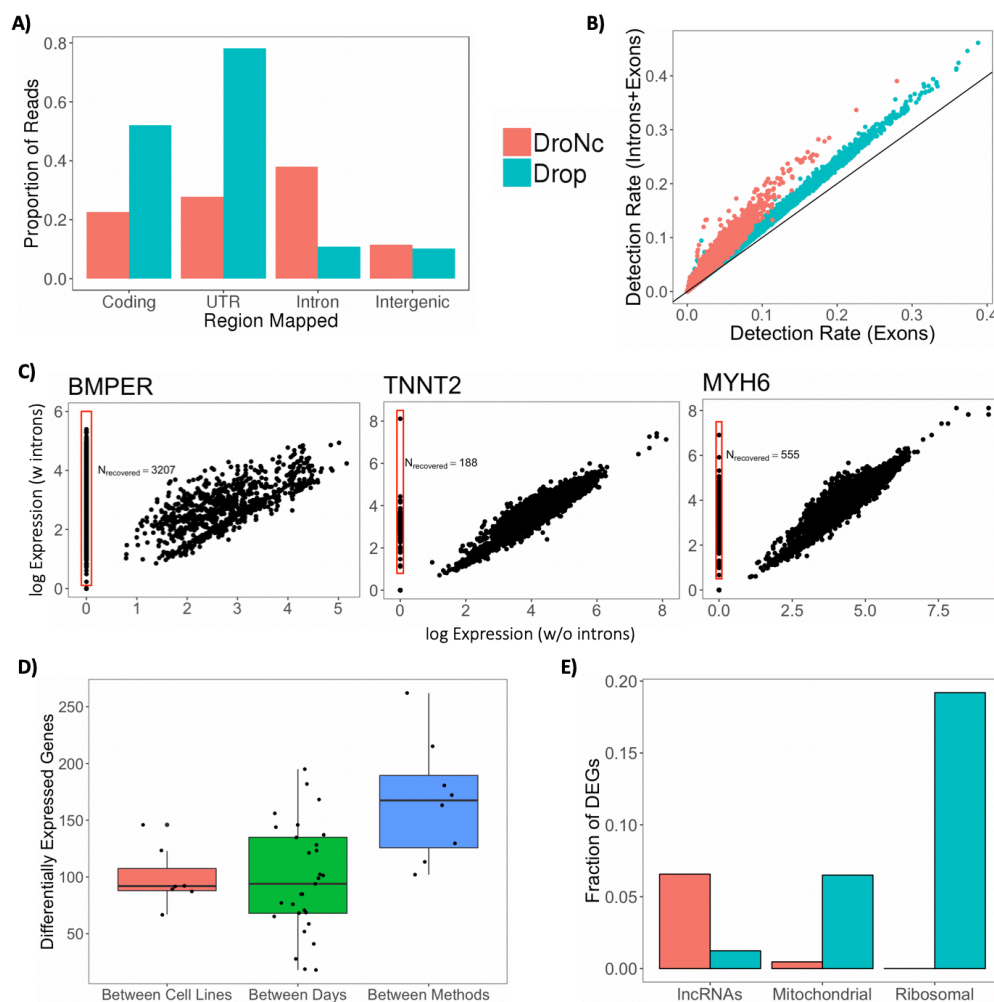

133  
 134 Figure 2: A) Distribution of reads across the genome in Drop-seq and DroNc-seq. B) Incorporating intronic reads in  
 135 quantifying gene expression increases each cell's gene detection rate by ~2X on average for DroNc-seq, enabling  
 136 detection of more genes per cell, compared with using exon reads only. C) Mesoderm and cardiac genes with  
 137 expression detected when incorporating intronic reads. D) Differential expression analysis between methods, days,  
 138 and cell lines. Genes with adjusted p-value < 0.05 and log-fold-change > 4 were kept. E) Proportion of differentially  
 139 expressed genes (DEGs) between Drop-seq and DroNc-seq associated with different gene categories.  
 140



141 To identify systematic differences in gene-specific detection rates between Drop-seq and DroNc-  
142 seq, we obtained differentially expressed genes (DEGs) between the two techniques for matched  
143 time-points and cell lines. As a comparison, we also performed differential gene expression  
144 analyses between time-points and between cell lines within each technique. We detected  
145 substantially more genes with differential expression between the two techniques than we observed  
146 between different time-points or cell lines (Figure 2D). This phenomenon was most pronounced  
147 for highly significant genes and became less pronounced at more lenient thresholds of log fold-  
148 change (Figure S11). The differentially detected genes directly reflect the sampling differences in  
149 cellular components for the two techniques. GO analysis on DEGs between Drop-seq and DroNc-  
150 seq revealed functional annotations associated with the sampling of different cellular components  
151 of the two techniques (Figure S5). In particular, 5% of genes detected at higher levels in DroNc-  
152 seq were lncRNAs (compared to 1% in Drop-seq), while 20% and 6% of genes detected at higher  
153 levels in Drop-seq were mitochondrial and ribosomal transcripts, respectively (Figure 2E).

154  
155 Next, we tested if the differences between Drop-seq and DroNc-seq in the number of detected UMI  
156 and enriched gene sets lead to inconsistent detection of cell types and variation in the inferred  
157 differentiation trajectory. To infer cell types found with Drop-seq and DroNc-seq data, we  
158 performed clustering of cells separately for each technique. We used the R package Seurat<sup>15</sup> to  
159 perform normalization, dimensionality reduction, clustering, and visualization of individual cells,  
160 grouped by cell types (see Methods). Cell types were assigned to clusters based on comparison of  
161 genes that are significantly upregulated in the cluster to known marker genes. All genes were tested  
162 for differential expression using a negative binomial likelihood ratio test within the Seurat package  
163 and p-values were adjusted for multiple testing using Bonferroni correction. For each cluster, we  
164 ordered genes by their average log-fold-change (logFC) in descending order to identify marker  
165 genes, as genes associated with cell type have a large fold-change in expression. Note that p-values  
166 (raw and adjusted) for all marker genes are small (adjusted  $p < 10^{-5}$ ). We used the top marker genes  
167 for each cluster to identify cell type specific genes (Figures S6 and S7). We found that the clusters  
168 identified by Drop-seq and DroNc-seq captured the anticipated differentiation from iPSCs to CMs  
169 over the course of 7 days (Figure 3A and B, Supplemental Figure 4). The cluster formed by cells  
170 from early time-points day 0 and day 1 contained pluripotent stem cells (Figure 3A and B, 'iPSC',  
171 orange cluster), in agreement with the expression of characteristic markers such as DPPA4. Cells  
172 harvested on day 3 mostly formed a separate cluster ('Cardiac progenitors', green cluster)  
173 composed of cells expressing markers concordant with cardiac progenitors (e.g. expression of  
174 *EOMES* (logFC=1.08), a mesendoderm progenitor marker gene). For days 7 and 15 the clusters of  
175 cells profiled by Drop-seq and DroNc-seq showed slight differences and we detected four clusters  
176 in Drop-seq compared to three for DroNc-seq, indicating that Drop-seq might be more sensitive  
177 towards detection. Drop-seq and DroNc-seq identified three clusters of ostensibly similar cell types.  
178 Two of these clusters contained cells predominantly expressing markers of CMs, including *MYH6*,  
179 *TNNT2*, *MYL*, and *MYBPC3* (Figure 3A, cyan cluster, 'Cardiomyocyte 1' and blue cluster,  
180 'Cardiomyocyte 2'). We also detected a cell cluster that expressed cardiac markers alongside  
181 markers of other lineages (e.g. *FOXA2* and *TTR*, pink cluster, 'Alternative lineage 1'). Drop-seq  
182 revealed an additional smaller cluster (purple, 'Alternative lineage 2', expression of *FLT1*) for  
183 which we did not find an equivalent cell population in DroNc-seq. These 'Alternative lineage'  
184 clusters might represent cells at intermediate stages, failures of differentiation, or differentiation  
185 towards alternative lineages. This heterogeneity and the detection of mesendodermal and  
186 endodermal cell populations, including endothelial cells, is in agreement with previous scRNA-  
187 seq data obtained during iPSC to cardiomyocyte differentiation<sup>16</sup>.

188

189 Table S1 shows the marker genes used to identify each cell type and its corresponding cellular  
190 prevalence. This comparison supported that both Drop-seq and DroNc-seq can identify the  
191 predominant cell types expected in a population. Importantly, the identified clusters showed  
192 expression of similar sets of genes in both techniques indicating that, despite differences in  
193 detection rate between the techniques and preferential detection of specific subsets of genes the  
194 identification of major cell types remained largely unaffected.

195  
196 To test how concordant the cluster assignment of Drop-seq and DroNc-seq are with bulk RNA-  
197 seq of similar cell types, we aggregated clusters representing iPSCs and iPSCs-CMs into pseudo-  
198 bulk samples. We compared these pseudo-bulk data to bulk RNA-seq data obtained from a  
199 previous study<sup>17</sup>. A total of 91 bulk RNA-seq samples composed of human iPSCs (n=18), iPSCs  
200 differentiating into CMs (n=51), and adult primary heart tissue (n=22) were used for a correlation  
201 analysis against pseudo-bulk iPSCs and CMs (Figure 3E). Drop-seq generally outperforms DroNc-  
202 seq for all three sample types regardless of pseudo-bulk type by ~ 50%, which is expected as bulk  
203 RNA-seq and Drop-seq both capture mRNA from whole cells. The iPSC pseudo-bulk samples of  
204 both methods are best correlated with iPSCs, followed by iPSC-Cardiomyocytes and primary heart  
205 tissue, as expected. For CM pseudo-bulk, both methods are best correlated with iPSC-  
206 cardiomyocytes, followed by primary heart tissue, and iPSCs.

207  
208 The time-series data allowed us to compare differentiation dynamics of iPSCs captured by Drop-  
209 seq and DroNc-seq. We observed that several cell types were present in more than one time-point  
210 (Figures 3 F, G). In particular, iPSCs were observed in days 0 and 1, while CMs are observed in  
211 days 7 and 15 in both Drop-seq and DroNc-seq data. Detection of the same or similar cell types  
212 across time-points should therefore enable us to reconstruct continuous single-cell differentiation  
213 trajectories<sup>14,18,19</sup> in an unsupervised manner to characterize the temporal relationship between  
214 different cell populations. Accordingly, we reconstructed differentiation trajectories of the cells  
215 from DroNc-seq and Drop-seq data using Monocle<sup>19</sup>. In order to reduce computational time, we  
216 selected the top 700 cells based on the number of genes detected at each time-point, for a total of  
217 3,500 cells and used them to reconstruct the single-cell trajectory during iPSC to CM  
218 differentiation.

219  
220 Inferred trajectories from DroNc-seq and Drop-seq data show one and two branching points,  
221 respectively. Coloring cells by cell type (Figures 3 H, I) and pseudo-time (Figure S9) confirms the  
222 temporal order of cell types in Figures 3 F, G. Monocle places iPSCs at the beginning of the  
223 trajectory, which has pseudo-time zero, followed by cardiac progenitors. Following cardiac  
224 progenitors along the trajectory, we find one branching point in DroNc-seq which broadly  
225 partitions CMs and the clusters associated with less well-defined cell types that might represent  
226 alternative lineage decisions or incomplete differentiation (Figure 3). In Drop-seq, these immature  
227 cells are on different branches and are both separated from the third branch containing CMs. These  
228 differences might reflect the higher gene expression fold differences observed for the genes we  
229 used to build the trajectories in Drop-seq compared to DroNc-seq. This might be a consequence of  
230 the lower read depth observed for DroNc-seq. Both methods suggested the differentiation of iPSCs  
231 into an intermediate cell type (cardiac progenitors), and finally a population of clearly identifiable  
232 cardiomyocytes, based on the expression of TNNT2 and MYH6, and a divergent trajectory towards  
233 alternative cell populations.

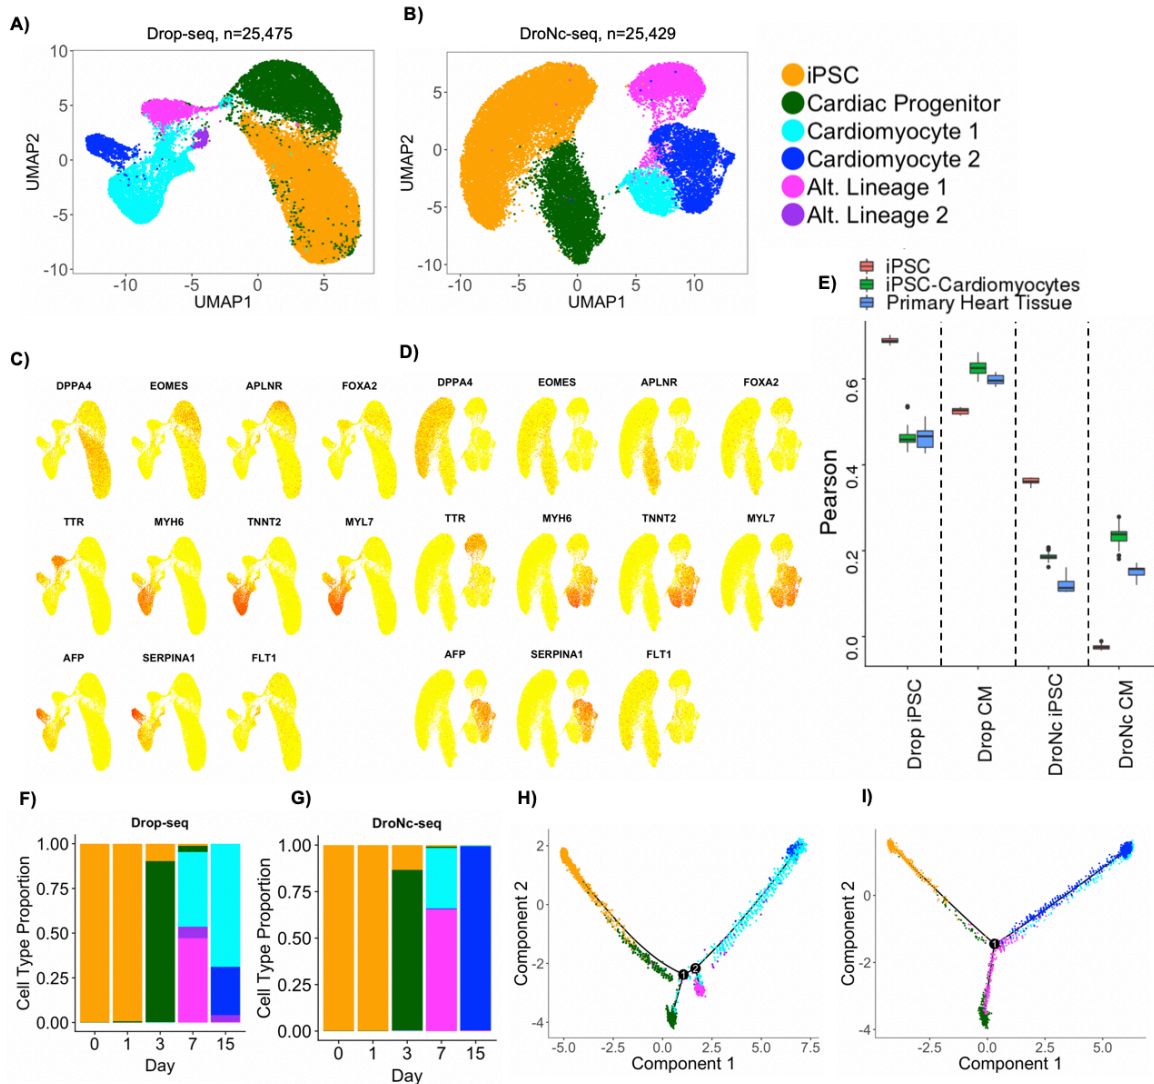

234  
 235 Figure 3: Cell type and single-cell trajectory analysis. A, B) Clustering results visualized with UMAP and colored by  
 236 inferred cell type for Drop-seq and DroNc-seq. C, D) Expression of marker genes overlaid on UMAP plots from A  
 237 and B for Drop-seq and DroNc-seq. E) Pearson correlation of DroNc-seq and Drop-seq pseudo-bulk against bulk  
 238 RNA-seq from iPSCs (n=18), iPSC-Cardiomyocytes (n=51), and primary heart tissue (n=22)<sup>17</sup>. F, G) Distribution of  
 239 cell types per time-point in Drop-seq and DroNc-seq, respectively. H, I) Inferred trajectories using Monocle with color  
 240 representing inferred cell types. A total of 3500 cells were used for the trajectory corresponding to 700 per time-point.  
 241

242 The comparison of Drop-seq and DroNc-seq data was motivated by the fact that Drop-seq cannot  
 243 be applied to generate single-cell RNA-seq data from adult primary heart tissue, but DroNc-seq  
 244 potentially can. Having established that DroNc-seq provides data ostensibly similar to Drop-seq  
 245 in our *in vitro* setup, we applied DroNc-seq to frozen human heart tissue to identify possible  
 246 cardiac cell sub-types and non-cardiac cells within the tissue.  
 247

248 We detected a total of 4,796 nuclei based on the presence of distinct cell barcodes using DroNc-  
 249 seq on tissue from an adult human male heart. We used both introns and exons to quantify number  
 250 of reads per nucleus, with mean number of genes and UMIs as 361 and 823, respectively. To focus  
 251 our analyses on good quality nuclei, our analyses used the top 30% (1,491) of cells based on the  
 252 number of genes detected. We performed cell type analysis on the heart cells using the same

253 procedure as described for the *in vitro* samples. As expected, the majority of cells (~82%) were  
254 CMs and myofibroblasts (Fig. 4A). Figure 4B shows the distribution of marker genes for each cell  
255 type obtained using negative binomial likelihood ratio test. A cluster was identified as CMs (Figure  
256 4A, pink cluster) based on marker genes *TNNT2* (logFC=0.71), *MYH6* (logFC=0.87), and  
257 *MYBPC3* (logFC=1.38). A second cluster was identified as likely myofibroblasts (Figure 4A, dark-  
258 green cluster) expressing the collagen genes *COL5A2* (logFC=1.95) and *COL6A3* (logFC=1.92)  
259 and periostin (*POSTN*). Finally, a third cluster was identified as endothelial cells (Figure 4A, grey  
260 cluster) based on vascular endothelial growth factor receptor *FLT1* (logFC=2.4) and blood clotting  
261 protein *VWF* (logFC=1.77). A fourth cluster expressing *CPE* (logFC=2.4) and *ENPEP* (logFC=2.5)  
262 was identified likely representing myofibroblasts (Figure 4A, black cluster). Additional marker  
263 genes are listed in Figure S10, which shows the top 10 upregulated genes in terms of logFC in  
264 each cluster.

265  
266 To better understand the cell type composition of the primary heart tissue, we first aggregated data  
267 from all nuclei into a pseudo-bulk heart sample and compared these to bulk data from iPSCs, iPSC-  
268 CMs, and primary heart tissue as before. We found that the pseudo-bulk heart sample most closely  
269 correlated with bulk RNA-seq data obtained from primary hearts, followed by iPSC-CMs. No  
270 correlation was observed with bulk iPSCs (Figure 4C). Second, to compare the heart nuclei data  
271 with the *in vitro* model we compared single nuclei of the heart to the DroNc-seq on iPSC-CMs  
272 using correlation analysis. Figure 4D shows a bi-clustered heatmap of the Pearson correlation  
273 coefficients with columns representing primary heart nuclei, and rows representing iPSC-CMs  
274 nuclei. Interestingly, hierarchical clustering of each (heart) nuclei's Pearson values (columns)  
275 confirms the clustering pattern found in Figure 4A, which demonstrates the presence of non-  
276 cardiomyocytes within the single-nuclei primary heart sample. In particular, the cluster identified  
277 as CMs (Figure 4A, pink cluster) has stronger correlation values with the iPSC-CMs than the  
278 myofibroblasts and endothelial cells (Figure 4A, dark-green and grey clusters). Clustering the rows  
279 also revealed the relative correlation strengths of the two iPSC-CMs clusters with the primary heart  
280 nuclei. In particular, the 'Cardiomyocyte 2' cluster generally has stronger correlation with the  
281 primary heart nuclei than the 'Cardiomyocyte 1' cluster. This could potentially reflect the  
282 observation that 'Cardiomyocyte 2' was associated with cells collected on day of our  
283 differentiation protocol and therefore to closer towards the mature state of CMs. We used iPSCs  
284 as an out-group for which we expect no correlation with primary heart nuclei, which is observed  
285 to be the case (Figure 4D).



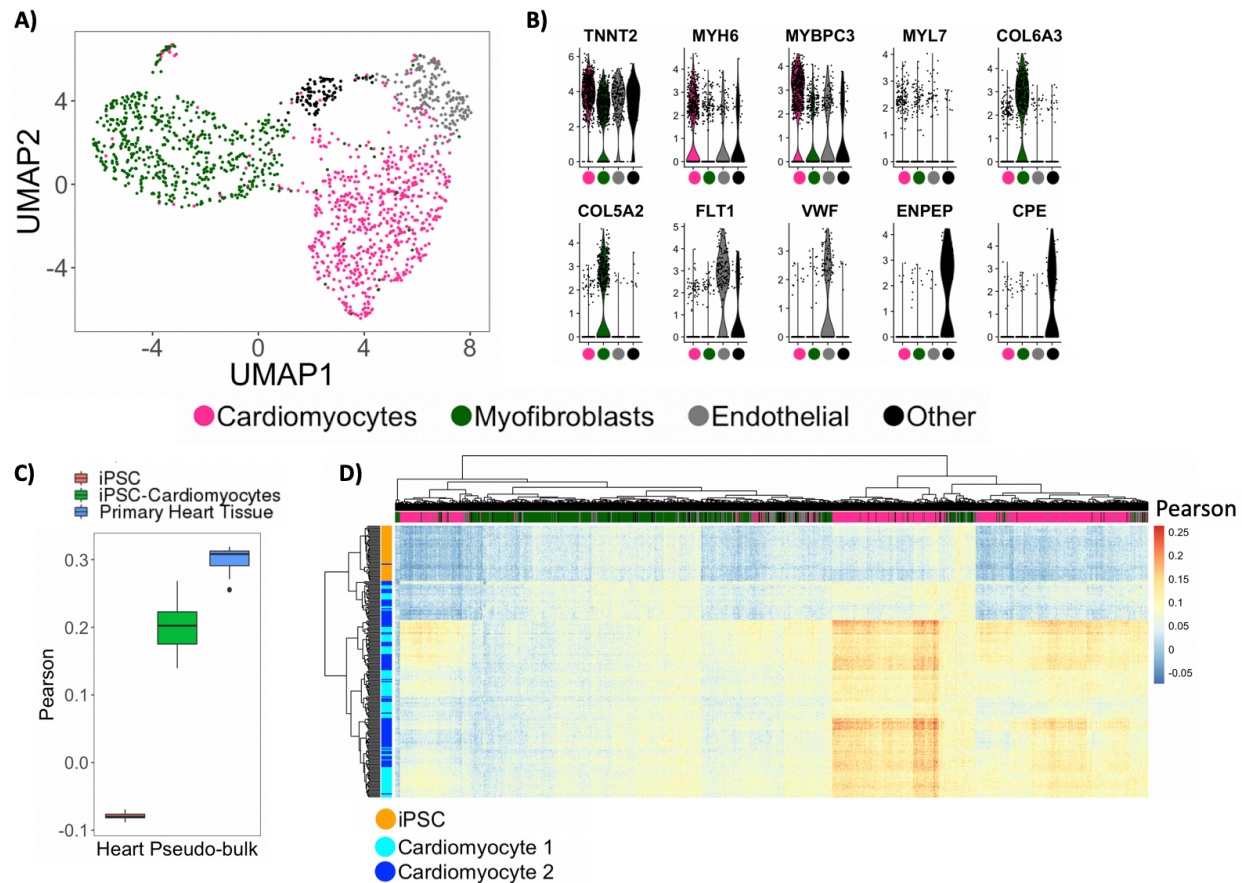

286  
287  
288  
289  
290  
291  
292

Figure 4: Application of DroNc-seq on human heart tissue. A) Cell type analysis visualized with UMAP. B) Distribution of marker genes identified with differential expression analysis. All genes listed have p-values  $< 10^{-29}$ . C) Pearson correlation of primary heart pseudo-bulk against bulk RNA-seq from iPSCs (n=18), iPSC-Cardiomyocytes (n=51), and primary heart tissue (n=22)<sup>17</sup>. D) Bi-clustering on Pearson correlation values of primary heart nuclei with nuclei from iPSCs and iPSC-derived cardiomyocytes.

## 293 Discussion

294

295 Building a cell atlas of the human body requires the expression profiling of all human tissues from  
296 a range of different samples, including tissues that are hard to dissociate, composed of fragile cells,  
297 and frozen specimens, all of which are incompatible with single-cell RNA sequencing. As an  
298 alternative, DroNc-seq, a high-throughput single-nucleus RNA sequencing protocol, has the  
299 potential to reveal tissue heterogeneity, at scale, based on *nuclear* RNA, and is being increasingly  
300 used to profile primary tissue at high throughput. However, it is unclear how DroNc-seq compares  
301 with earlier single-cell RNA-seq protocols like Drop-seq across a range of different cell types and  
302 tissues. Previous studies have performed cell type comparisons using nuclear vs. whole-cell RNA  
303 using full-length mRNA sequencing assays at low throughput<sup>10,11</sup>. Drop-seq and DroNc-seq have  
304 been compared using adult mouse kidneys cells<sup>12</sup>. We performed a direct comparison of high-  
305 throughput, single-cell (Drop-seq) and single-nucleus (DroNc-seq) RNA-seq using iPSCs  
306 differentiating into CMs. Together with single-nucleus profiling of primary CMs from adult human  
307 heart tissue, this study enabled us to compare cell type detection, transcriptome profiling and infer  
308 cellular differentiation with two complementary high-throughput techniques, using an *in vitro*

309 model of CM differentiation, and compare them directly to human primary CMs obtained from a  
310 frozen heart sample (see Methods) using DroNc-seq.

311  
312 As expected, the number of UMIs per nucleus in DroNc-seq are lower than those for cells in Drop-  
313 seq. Consequently, the gene detection rate in DroNc-seq was significantly lower than for Drop-  
314 seq (Figure 1C). However, given the high number of reads in DroNc-seq that mapped to intronic  
315 regions we reasoned that inclusion of such reads might increase the gene detection rate. Indeed,  
316 intron inclusion significantly increased the sensitivity of DroNc-seq and improved cluster  
317 separation and cell type identification, in agreement with previous studies<sup>10-12</sup>. We also found that  
318 the inclusion of introns increased gene detection rate in single nuclei samples. Of note, a significant  
319 proportion of the intronic reads seems to originate not from transcripts primed at the 3' end but  
320 from direct priming to polyA stretches in introns<sup>14</sup> (Figure 2). While such reads still scale with the  
321 expression level of a transcript, the assumption that transcript levels are uniquely quantified by a  
322 single UMI may be violated in these cases.

323  
324 Given the difference in input material, i.e., cellular vs. nuclear RNA, it is not surprising that we  
325 found a significant proportion of genes that are differentially expressed between Drop-seq and  
326 DroNc-seq samples. Some of the most highly enriched sets of genes reflected the technical  
327 differences between the two technologies. Genes specifically enriched in Drop-seq are ribosomal  
328 and mitochondrial. DroNc-seq presumably loses these transcripts that are predominantly localized  
329 in the cytoplasm. Conversely, as a class, lncRNAs are enriched in DroNc-seq which agrees with  
330 the nuclear localization of many of them.

331  
332 Expression profiles in Drop-seq and DroNc-seq confirmed the differentiation of iPSCs into CMs  
333 and revealed major cell types found within the *in vitro* differentiation model of iPSC-CMs. These  
334 data also confirmed heterogeneity observed during differentiation. Drop-seq and DroNc-seq  
335 detected a population of cardiac progenitors with cellular prevalence 23.3% and 18.2%,  
336 respectively. They also both detected two clusters representing CMs: cardiomyocyte 1 (16.1% and  
337 5.6% prevalence) and cardiomyocyte 2 (4.2% and 12.7% prevalence). Both methods also revealed  
338 a population of cells, 'Alternative lineage 1', that might represent alternative fate or that failed to  
339 reprogram fully, which accounted for 5.9% and 11.3% of all cells in Drop-seq and DroNc-seq,  
340 respectively. The presence of non-CMs during late-stage is expected for the *in vitro* differentiation  
341 model and has been observed previously<sup>16</sup>. Accordingly, the proportion of cells differentiating into  
342 CMs expressing TNNT2, assessed by FACS, varies widely between 20-80%<sup>13</sup>. Based on our cell  
343 type assignment in Drop-seq data, we obtained 28% and 29% cardiomyocytes on day 7 for the two  
344 cell lines and 70% CMs on day 15 for cell line 2, which fall within the expected range.

345  
346 Drop-seq revealed an additional smaller cluster (purple, 'Alternative lineage 2', expression of  
347 *FLT1* and comprising 1.4% of the total population) for which we did not find an equivalent cell  
348 population in DroNc-seq. The reasons behind the failure of DroNc-seq to identify the small  
349 fraction of cells identified as 'Alternative lineage 2' in Drop-seq may be due to the lower capture  
350 rate of DroNc-seq (mean number of detected genes was 672) compared to Drop-Seq (mean number  
351 of detected genes was 962) (Figure S8) which might result failure of the clustering approach to  
352 resolve this sub-population in DroNc-seq, or due to the preferential loss of the particular cell type  
353 arising from DroNc-seq's nuclei dissociation protocol. The mean number of genes detected in this  
354 subpopulation in Drop-seq was 1032, representing the cluster with the highest gene detection rate.  
355 It is possible that this facilitated the detection of this cluster in Drop-seq while the lower detection  
356 rate in DroNc-seq combined with the small number of cells corresponding to this cluster in the

357 sample lead to the loss of this population during clustering. However, we cannot rule out specific  
358 loss or selection biases for of the cell type introduced during DroNc-seq sample preparation.

359  
360 We chose the iPSC-to-CM differentiation because in addition to cell type detection, the highly  
361 heterogenous but temporally coordinated process allowed us to compare cellular lineages inferred  
362 based on Drop-seq and DroNc-seq data, respectively. Indeed, we were able to infer similar  
363 trajectories for both Drop-seq and DroNc-seq (Figure 3H and I). Both trajectories show continuous  
364 differentiation of iPSCs into cardiac progenitors along a single path, which then branches into CM  
365 and non-cardiac cells (progenitor cells and alternative lineages). This suggests that a substantial  
366 proportion of cells identified as CM progenitors in our cluster analysis are diverging from the  
367 differentiation trajectory relatively early on and ultimately are not becoming mature  
368 cardiomyocytes<sup>16</sup>. In the case of Drop-seq ‘Alternative lineage 1’ and ‘Cardiac progenitor’ cells  
369 are branching off on two separate points, while for DroNc-seq both populations are on one branch.  
370 The additional branching point might reflect the higher resolution achieved by Drop-seq.

371  
372 Compared with bulk samples, Drop-seq pseudo-bulk is closer to tissue-level expression than  
373 DroNc-seq. This is expected as the tissue data represents RNA-seq data generated using whole  
374 cells, rather than nuclei. However, this difference does not mask cell type specific differences in  
375 the degree of correlation with bulk samples from iPSCs, iPSC-CM, and heart. Both Drop-seq and  
376 DroNc-seq CM pseudo-bulk correlate the best with bulk iPSC-CMs samples followed by primary  
377 heart tissue and iPSCs. While the iPSCs correlate best with the bulk iPSCs for both methods. The  
378 comparison with bulk samples provides further evidence for the cell type labels that were assigned  
379 based on marker genes.

380  
381 Having demonstrated that Drop-seq and DroNc-seq performed similarly in detecting heart-like cell  
382 types, we applied DroNc-seq to primary heart tissue from adult human male. As expected, cell  
383 type analysis of the tissue revealed mostly CMs (43%) and (myo)fibroblasts (39%), as well as a  
384 smaller population of endothelial cells (12%). Interestingly, TNNT2 was detected in all the cell  
385 types but was significantly upregulated in the CM cluster. TNNT2 being a marker gene for CMs  
386 suggested the possibility that all nuclei are of the same broad category of cell type. Correlating  
387 transcription profiles from primary heart nuclei with the iPSC-derived CM nuclei further supports  
388 the inferred cell types from the primary heart tissue. The transcriptome profiles of primary heart  
389 nuclei that were assigned to the ‘Cardiomyocyte’ cluster are more strongly correlated with the  
390 profile of iPSC-CMs compared with primary heart nuclei in other clusters.

391  
392 Sequencing of additional cells and increased read depth will help to increase the resolution and  
393 potentially lead to detection of additional cell types. However, it is important to keep in mind that  
394 tissue samples are not uniform mixtures of cell types. Thus, the creation of comprehensive cell  
395 maps likely requires sampling of a given tissue in multiple different locations, as seen from the  
396 relatively low cell type complexity in DroNc-seq data on the human heart tissue when sampled  
397 from only one anatomical region.

398  
399 This comparison of Drop-seq and DroNc-seq demonstrates the capability of DroNc-seq in  
400 dissecting the multicellular environment within complex tissue such as the heart, which would  
401 otherwise not be possible with Drop-seq. We expect that DroNc-seq will be used to perform high-  
402 throughput transcriptomic profiling of tissues for which it is difficult to obtain suspensions of intact  
403 single cells and aid in initiatives such as the Human Cell Atlas and the Human Tumor Atlas.

404

## 405 **Methods**

### 406 Cell Culture and Differentiation

407 We used iPSCs from two individuals from a previously established panel of LCL-derived iPSCs<sup>20</sup>.  
408 iPSCs were seeded on 100 mm dishes 3-5 days prior to differentiation. At 70-100% confluency,  
409 growth media was replaced with heart media: RPMI (Thermo Fisher Scientific, 14-040-CM)  
410 supplemented with B-27 Supplement minus insulin (Thermo Fisher Scientific, A1895601), 2 mM  
411 GlutaMAX (Thermo Fisher Scientific, 35050-061), and 100 mg/mL Penicillin/Streptomycin  
412 (Corning, 30002C1). A heart medium/Matrigel mix was made using this medium along with a  
413 1:100 dilution of Matrigel (Corning, 35427) and 12  $\mu$ M of the GSK-3 inhibitor CHIR99021  
414 trihydrochloride (Tocris, 4953). This medium was changed to base heart media 24 hours later (Day  
415 1). On Day 3, the previously described medium was replaced with heart medium containing 2  $\mu$ M  
416 Wnt-C59 (Tocris, 5148). On days 5, 7, 10, 12 and 14 of the differentiation, media was refreshed  
417 with base heart media. Heart medium changes occurred daily. Beating CMs cells were observed  
418 around Day 7.

419

### 420 Cell Processing

421 At each time-point, cells were harvested from 100 mm plates by treating with Accutase (BD  
422 Biosciences, #561527) to generate a single cell suspension; from Day 7 onward, a cell scraper was  
423 also employed to release adherent cells from plates. Cells were centrifuged at 300 xg for 5 minutes  
424 and supernatant was aspirated off. Cells were washed 3 times with 1X PBS, 0.01% BSA (NEB,  
425 #B9000S), henceforth called PBS-BSA). 10  $\mu$ L of cells was combined with trypan blue for  
426 counting in an NI hemocytometer (InCyto, DHC-N01-2). Viability of cells at each time point was  
427 recorded (see Table 1). Cells were also labelled with a combination of 4',6-diamidino-2-  
428 phenylindole or DAPI (Sigma, Cat #D9542) and Wheat Germ Agglutinin (WGA; Thermo Fisher  
429 Scientific, W11262) to assess nucleus and cell membrane integrity under fluorescence imaging, as  
430 shown in Figure 5A. 400,000 cells were taken and suspended in 2 mL PBS-BSA (200,000 cells/mL)  
431 for Drop-seq, and the remaining cells were used for nuclei isolation for DroNc-seq.

432

433 Table 1: Viability of harvested cells from each iPSC-CMs differentiation time-point

434

| Time Point           | Date       | Viability |
|----------------------|------------|-----------|
| Time Course 1 Day 0  | 11/16/2017 | 70%       |
| Time Course 1 Day 1  | 11/15/2017 | 50%       |
| Time Course 1 Day 3  | 11/17/2017 | 80%       |
| Time Course 1 Day 7  | 11/21/2017 | 60%       |
| Time Course 2 Day 0  | 1/22/2018  | 60%       |
| Time Course 2 Day 1  | 1/23/2018  | 80%       |
| Time Course 2 Day 3  | 1/25/2018  | 80%       |
| Time Course 2 Day 7  | 1/29/2018  | 90%       |
| Time Course 2 Day 15 | 2/6/2018   | 55%       |

435

436 Nuclei were isolated using the Nuclei EZ Prep isolation kit (Sigma, Cat #NUC-101). Briefly, cells  
437 were resuspended in 4 mL EZ Prep Lysis Buffer and incubated on ice for 10 minutes. After  
438 incubation, cells were agitated using a P1000 pipette and 10  $\mu$ L of sample was imaged. DAPI  
439 (Sigma, Cat #D9542) and Wheat Germ Agglutinin (WGA; Thermo Fisher Scientific, W11262)  
440 were used to determine if the cellular membrane had properly lysed for each cell. If intact cells  
441 were still present, 2 mL of sample was moved to a glass dounce tissue grinder (Sigma, Cat #D8938)



442 and dounced 5 times. After douncing, another 10  $\mu$ L sample was imaged under the microscope  
443 with DAPI and WGA staining as before to determine if high-quality, intact nuclei were obtained  
444 (see Figure 5B). We adjusted the number of dounces until only nuclei were found. As iPSCs  
445 differentiated further into CMs, the number of required dounces needed to be increased. For  
446 example, day 3 of differentiation required 5 dounces to obtain proper cell lysis and intact nuclei,  
447 while Day 7 required 12 dounces. Nuclei were spun down at 500 xg for 5 minutes at 4 °C. After  
448 centrifugation, the nuclei were washed with nuclei suspension buffer (NSB; 1X PBS, 0.01% BSA,  
449 and 0.1% RNase inhibitor (Lucigen, #F83923)), resuspended in 2 mL NSB and filtered using a  
450 35  $\mu$ m cell strainer (Corning, #352235). 10  $\mu$ L of nuclei suspension was sampled using a NI  
451 hemocytometer and the concentration adjusted to a final loading concentration of 300,000  
452 nuclei/mL in NSB of which 2 mL was used for DroNc-seq.

453

#### 454 Microfluidic Co-encapsulation of Cells/Nuclei and Barcoded Beads

455 For **Drop-seq**, 2 mL of cells at 200,000 cells/mL in PBS-BSA was loaded in a 3 mL syringe (BD,  
456 #309657). A custom-built 90  $\mu$ m Drop-seq microfluidic device (CAD file supplied separately) was  
457 used for droplet generation, creating droplets smaller than the standard Drop-seq protocol.<sup>5</sup> We  
458 chose to use the 90  $\mu$ m droplets because the effective concentration of cellular RNA in the 90  $\mu$ m  
459 drops is doubled, leading to better RNA capture, compared to 125  $\mu$ m droplets used in Drop-seq.  
460 Indeed, we see an increase in RNA capture for cells of smaller size, such as iPSC. We note that  
461 the increase in capture efficiency often fails to translate to larger sized cells (~15  $\mu$ m), likely due  
462 to the higher concentrations of the lysed cell's endogenous RNase and lysosomes, etc. in the drop.  
463 Cells at 200,000 cells/mL and ~2,600,000 droplets/mL (droplet volume is ~380 pL) amounts to a  
464 Poisson loading distribution with  $\lambda \approx 0.076$ . DNA barcoded beads (ChemGenes, Macosko-2011-  
465 10(V+)) were washed, filtered, and suspended in Drop-seq lysis buffer, also at 200,000 beads/mL  
466 and kept in suspension under constant stirring using a magnetic tumble stirrer and flea magnet  
467 (V&P Scientific, VP 710 Series, VP 782N-3-150). Beads and cells were co-flowed into the device,  
468 each at 3 mL/hr, along with a surfactant-oil mix (BioRad, #1864006) at 12 mL/hr that was loaded  
469 into a 10 mL syringe (BD, #302995) and used as the outer carrier oil phase. Reverse emulsions  
470 droplets were generated at ~3000 drops/sec and collected in two batches of 20 minutes each in 50  
471 mL tubes (Genesee Scientific, #28-106). After collection, the standard Drop-seq protocol for bead  
472 recovery, washing, and reverse transcription was followed.<sup>5</sup> After washes and DNaseI treatment  
473 as per Drop-seq protocol<sup>5</sup>, cDNA amplification was performed on 75,000 RNA-DNA barcode  
474 bead conjugates in a 96-well plate (Genesee Scientific, #24-302) loaded at 5000 beads per well,  
475 for a total of 15 wells and amplified for 15 PCR cycles using template switching.<sup>5</sup> Post-PCR  
476 cleanup was performed by removing the STAMPs (Single Transcriptome Attached to Micro-  
477 Particles<sup>5</sup>) and pooling the supernatant from the wells together into a single 1.7 mL tube (Genesee  
478 Scientific, #22-281LR) along with 0.6X Ampure XP beads (Beckman Coulter, #A63880). After  
479 adding the Ampure beads to the PCR product, the tube was incubated at room temperature for 2  
480 minutes on a thermomixer (Eppendorf Thermomixer C, #5382000023) set to 1250 rpm, and for  
481 another 2 minutes on bench for stationary incubation. Next, the tube was placed on a magnet, and  
482 4X 80% ethanol washes were performed with 1 mL ethanol added in each wash. cDNA was eluted  
483 in 150  $\mu$ L of water and the concentration and library size were measured using Qubit 3 fluorometer  
484 (Thermo Fisher) and BioAnalyzer High Sensitivity Chip (Agilent, #5067-4626). A BioAnalyzer  
485 trace is provided in Figure 5C as an example of the amplified transcriptome obtained from a Drop-  
486 seq run. 450 pg of the cDNA library was used in Nextera Library prep, instead of 650 pg as  
487 suggested in the Drop-seq protocol<sup>5</sup> to obtain Nextera libraries between 300 – 600 bp.

488

489 For **DroNc-seq**, a 75  $\mu\text{m}$  microfluidic device<sup>9</sup> was used. 2 mL of nuclei at 300,000 nuclei/mL were  
490 loaded into a 3 mL syringe and flowed at 1.5 mL/hr. Barcoded beads were filtered with a 40  $\mu\text{m}$   
491 filter to select for smaller beads to prevent clogging events in the relatively smaller microfluidic  
492 channels. 2 mL of beads were suspended at 350,000 beads/mL in Drop-seq lysis buffer, loaded in  
493 a 3 mL syringe, kept suspended through a magnetic tumble stirrer, and flowed at 1.5 mL/hr, along  
494 with carrier oil-surfactant mix loaded in 10 mL syringe and flowed at 12 mL/hr. Droplets were  
495 generated at  $\sim$ 4,500 drops/sec and collected in 50 mL tubes in two batches for 22 minutes each.  
496 After collection, the standard DroNc-seq protocol for bead recovery and reverse transcription was  
497 followed.<sup>9</sup> cDNA amplification was performed on the STAMPs as above, for 15-20 wells at 5000  
498 beads per well, for 15 PCR cycles. Cleanup was performed after removing the STAMPs and adding  
499 0.6X Ampure XP beads (Beckman Coulter, #A63880) to the pooled supernatant followed by room  
500 temperature incubation for 2-minutes on an Eppendorf thermomixer set to 1250 rpm and another  
501 2-minute stationary incubation. Tubes were placed on a magnet and beads were allowed to migrate  
502 prior to 4X washes in 80% ethanol. cDNA was eluted in 10  $\mu\text{L}$  of water per well and DNA  
503 concentration was measured using a Qubit 3 fluorometer (Thermo Fisher). 650 pg of DNA was  
504 used in each Nextera reaction for fragmenting, tagging, and amplifying to create Nextera library.  
505 Nextera library size and concentrations were determined using a BioAnalyzer DNA High  
506 Sensitivity Chip (Agilent, #5067-4626).  
507

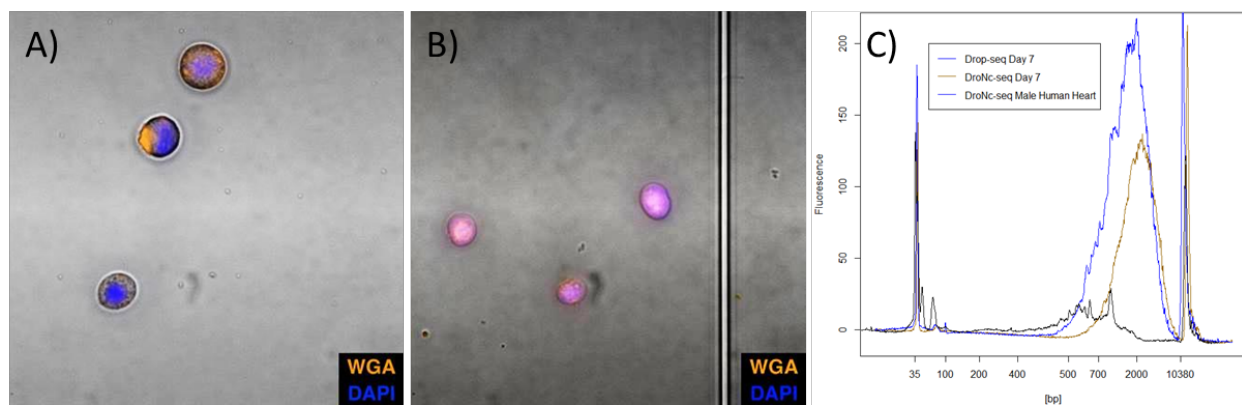

508  
509 Figure 5: Experimental quality control metrics. Images of Day 1 of differentiation of human iPSC derived  
510 cardiomyocyte (iPSC-CM) cells- A) and nuclei- B) stained with DAPI and WGA; C) BioAnalyzer traces of WTA  
511 product from Drop-seq on iPSC-CM Day 7, DroNc-seq on iPSC-CM Day 7, and DroNc-seq on archived adult male  
512 heart tissue.  
513

#### 514 Nuclei Isolation from Adult Human Heart Tissue

515 Post-mortem human heart tissue was provided by the National Disease Research Interchange  
516 (NDRI). The sample (m, 68 yrs) had been stored at  $-80^{\circ}\text{C}$  for 11 years before it was processed for  
517 DroNc-seq. The frozen tissue sample was weighed and cut with a scalpel and 32.8 mg of sample  
518 was processed, by mincing with the scalpel. The sample was placed into a glass dounce tissue  
519 grinder (Sigma, Cat #D8938) with 2 mL of ice-cold EZ-Prep lysis buffer from the Nuclei EZ-prep  
520 Isolation Kit (Sigma, Cat #NUC-101). The tissue was dounced 25 times with Pestle A, transferred  
521 to a conical tube with an additional 2 mL lysis buffer, and incubated on ice for 5 minutes. Sample  
522 was then centrifuged at 500 xg for 5 minutes at  $4^{\circ}\text{C}$ . Supernatant was aspirated off and replaced  
523 with 2 mL lysis buffer. Sample was transferred back to the tissue grinder and dounced 25 times  
524 with Pestle B. Sample was then put back into a conical tube with an additional 2 mL lysis buffer,  
525 centrifuged, and washed with 4 mL lysis buffer followed by 5-minute incubation on ice. 10  $\mu\text{L}$  of  
526 sample was taken and combined with DAPI and Wheat Germ Agglutinin (WGA) and put into an  
527 NI hemocytometer (InCyto, DHC-N01-2) to check for nuclei quality. If whole cells were still

528 present, additional douncing with Pestle B was performed (additional 25-35 dounces expected)  
529 before checking again using DAPI and WGA. The resulting nuclei were centrifuged, lysis buffer  
530 was aspirated, and nuclei were washed and resuspended in Nuclei Suspension Buffer (NSB; 1x  
531 PBS, 0.01% BSA, and 0.1% RNase inhibitor (Lucigen, #F83923)). Nuclei were filtered once with  
532 a 35  $\mu\text{m}$  cell strainer (Corning, #352235), once with a 20  $\mu\text{m}$  filter (pluriSelect, #43-50020-01),  
533 and twice with a 10  $\mu\text{m}$  filter (pluriSelect, #43-50010-01) and stored on ice for processing. Nuclei  
534 were counted using an NI hemocytometer and brought to a final concentration of 300,000  
535 nuclei/mL in 2 mL NSB for DroNc-seq. To assess the quality of RNA from the archived heart  
536 tissue, we ran an independent experiment to extract total RNA using a Qiagen kit (Qiagen, #74004)  
537 and measured using a BioAnalyzer RNA 6000 Pico kit (Agilent, #5067-1513). A RIN score of ~5  
538 was obtained for this sample.

539

#### 540 DroNc-seq on Nuclei Harvested from Heart Tissue

541 DroNc-seq was performed as previously described with a few exceptions: single 30-minute droplet  
542 collection was performed using a 75  $\mu\text{m}$  microfluidic device and flow rates mentioned previously.  
543 During whole transcriptome amplification, 12 cycles of PCR were performed on 30 wells with  
544 5000 barcoded beads per well. Clean-up was performed as described above. cDNA from each well  
545 was eluted in 2  $\mu\text{L}$  of water and pooled for quantification by BioAnalyzer (Figure 5C) and Qubit,  
546 followed by Nextera library preparation.

547

#### 548 Sequencing

549 Drop-seq and DroNc-seq samples for each differentiation time-point were sequenced in a single  
550 run, with 150-200 million reads allocated per sample. Sample libraries were loaded at ~1.5 pM  
551 concentration and sequenced on an Illumina NextSeq 500 using the NextSeq 75 cycle v3 kits for  
552 paired-end sequencing. 20 bp were sequenced for Read 1, 60 bp for Read 2 using Custom Read 1  
553 primer, GCCTGTCCGCGGAAGCAGTGGTATCAACGCAGAGTAC<sup>5</sup>, according to  
554 manufacturer's instructions. Illumina PhiX Control v3 Library was added at 5% of the total loading  
555 concentration for all sequencing runs.

556

#### 557 RNA-Seq Data Processing and Analyses

558 The differentiating iPSCs were sampled at specific timepoints during a 15-day period (days 0, 1,  
559 3, 7, 15) using both Drop-seq and DroNc-seq (Fig 1A). A total of 17 sequencing runs were  
560 performed over the course of the differentiation. Each sequencing run produced paired-end reads,  
561 with one pair representing the 12 bp cell barcode and 8 bp unique molecular identifier (UMI), and  
562 the second pair representing a 60 bp mRNA fragment. We developed a Snakemake<sup>21</sup> protocol that  
563 takes a FASTQ file with such paired-end reads as input and produces an expression matrix  
564 corresponding to the UMI of each gene in each cell. The protocol initially performs *FastQC*<sup>22</sup> to  
565 obtain a report of read quality. Next, it creates a whitelist of cell barcodes using *umi\_tools*<sup>23</sup> 0.5.3,  
566 which is a list of cell barcodes with at least 30k reads. Next, each paired-end read is combined into  
567 a single read where the read name contains the cell barcode and UMI extracted from paired end  
568 read 1, and the sequence content corresponds to paired end read 2. This is done for every paired  
569 end read and placed into a single "tagged" FASTQ file. The tagged FASTQ file contains only the  
570 cell barcodes found in the whitelist. Finally, the protocol trims the ends of reads to remove polyA  
571 sequences and adaptors using *cutadapt*<sup>24</sup> 1.15. The tagged and trimmed FASTQ file is aligned to  
572 the human reference genome (version GRCh38) using the *STAR*<sup>25</sup> aligner version 2.5.3, which  
573 returns a BAM file sorted by coordinate. Next, we use *featureCounts*<sup>26</sup> version 1.6.0 to assign each  
574 aligned read to a feature on the genome. Finally, we use the *count* function from *umi\_tools* to  
575 create a count matrix representing the frequency of each feature in the BAM file. The pipeline is

576 available at [github.com/aselewa/dropseq\\_pipeline](https://github.com/aselewa/dropseq_pipeline). A total of 17 count matrices  
577 were produced by this pipeline, 9 of which correspond to Drop-seq and 8 correspond to DroNc-  
578 seq. In order to incorporate introns into the counting process, the UMI count of a gene was  
579 calculated as the sum of its exon and intron UMIs. This is particularly important for DroNc-seq as  
580 approximately half the reads obtained come from intronic regions of pre-spliced mRNA.  
581 GENCODE version 28 annotations contain exon features and gene features but do not contain  
582 intron features. To derive an intron annotation file, we used exon and gene features. Exon regions  
583 were subtracted from gene regions (on the same strand) and the remainder was counted as the  
584 intron region for said gene. Then the expression level of a gene is given by the sum of the number  
585 of intron and exons.

586  
587 From each sequencing run, approximately 5000 cells were obtained with an average read depth of  
588 30k – 40k per cell. Low quality cells were filtered based on the number of genes detected. A gene  
589 was considered detected in a cell if there was at least 1 UMI present. Cells with less than 400 genes  
590 and nuclei with less than 300 genes detected were removed. Low quality genes were also filtered  
591 if they were not detected in at least 10 cells, in order to reduce noise and computation cost. The  
592 total numbers of cells remaining were approximately 23,554 and 24,318 for Drop-seq and DroNc-  
593 seq, respectively. After filtering, all expression matrices from Drop-seq experiments were merged  
594 into a single expression matrix. The merging was done by taking the union of all genes. If a  
595 particular dataset did not contain a gene that is expressed in another dataset, we set the expression  
596 level to zero in the first dataset. Similarly, all expression matrices corresponding to DroNc-seq  
597 were merged into a single expression matrix. Both merged matrices were processed and analyzed  
598 separately downstream. Seurat<sup>15</sup> was used to perform normalization, clustering, and cell type  
599 analysis. R scripts used for the analyses in this paper are documented at  
600 [github.com/aselewa/czi](https://github.com/aselewa/czi).

### 601 Internal Priming

602 We used the MEME<sup>27</sup> suite to find all 5 bp stretches of adenines using the human genome build  
603 hg38. Next, we merged all 5 bp motifs in order to obtain all continuous polyA tracts. A total of  $\sim 2$   
604  $\times 10^7$  motifs at least 5 bp long were identified genome-wide. BAM files from each time-point  
605 were merged and only intronic reads were kept. Intronic reads were extended by 20 bp on each  
606 side and intersected with the adenine motifs in a strand-specific way. The motifs were centered by  
607 the coordinates of the reads they intersect with and a histogram motif of 3' positions was obtained  
608 (Figure S3).

### 609 Normalization and Scaling

610  
611 Following the analysis procedure recommended by Seurat, we first normalize the count data. Each  
612 cell's gene-specific UMIs were divided by the total number of UMI in the cell scaled to  $10^4$ , which  
613 yields TP10k (transcripts per 10k) values. Figure S2 shows the relationship between the mean  
614 expression (mean TP10k) and the length of the gene. The relationship is relatively weak, therefore  
615 normalizing by just the library size is sufficient. A pseudo-count of 1 was added to all scaled values  
616 followed by a natural log transformation. After the log-transformation, the values were  
617 standardized, i.e. mean-centered and scaled such that each gene has unit variance. These log-  
618 normalized, and standardized data were used in downstream analyses to perform dimensionality  
619 reduction and reconstruction of differentiation trajectories.

### 620 Dimensionality Reduction



623 The first step performed in dimensionality reduction is principal components analysis (PCA). Prior  
624 to PCA, Seurat calculates the gene dispersion vs. mean expression in order to obtain a subset of  
625 highly variable genes, which reduces the computational time of PCA compared with using the  
626 entire subset of genes identified in the experiment. Highly variable genes were selected based on  
627 a threshold of 1.5 for the dispersion level and a minimum expression level of 0.15 (on log scale)  
628 yielding 400 genes and 350 genes with Drop-seq and DroNc-seq, respectively. These highly  
629 variable genes were used to calculate principal components for Drop-seq and DroNc-seq data. The  
630 top 7 principal components, which explained 60% and 70% of variation for Drop-seq and DroNc-  
631 seq, respectively, were used to perform clustering and the results were visualized with the Uniform  
632 Manifold Approximation and Projection (UMAP<sup>28</sup>), which produced a 2-dimensional visualization  
633 of the data (Figures S4 A, B left). We also performed tSNE on the same data (Figures S4 A, B  
634 right) using a perplexity of 50 and found that UMAP captures more of the global structure in the  
635 data, as previously reported<sup>29</sup>. A minimum distance of 0.5 and 0.6 were used in UMAP for Drop-  
636 seq and DroNc-seq, respectively.

637

### 638 Cell type Analysis

639 The principal components were used for graphical clustering using the *FindClusters* command of  
640 Seurat. A resolution parameter of 0.13 is used to obtain 6 clusters in Drop-seq and 5 clusters in  
641 DroNc-seq. In order to determine cell types from the clusters, we performed differential expression  
642 analysis using the *FindAllMarkers* function and *negbinom* test in Seurat. This identifies  
643 differentially expressed genes between every two groups of cells using a likelihood ratio test of  
644 negative binomial generalized linear models. The Seurat's *negbinom* test yields relatively low false  
645 positive rates for differential expression analyses, compared with other parametric methods<sup>30</sup>. The  
646 p-values were adjusted for multiple testing using the Bonferroni correction. Furthermore, as we  
647 were only interested in upregulated genes as these will define the cell type, we ordered genes in  
648 each cluster, by their average log-fold-change (logFC) in descending order. Marker genes were  
649 identified based on functional annotations as these genes associated with cell types have a large  
650 fold-change in expression. Figures S6 and S7 show the top 10 differentially expressed genes in  
651 each identified cluster for Drop-seq and DroNc-seq, respectively.

652

### 653 Pseudo-bulk Analysis

654 Raw RNA-seq counts were obtained from GEO accession GSE110471 and the human samples  
655 were extracted from the population. The raw counts were converted into log-TP10k's. After  
656 filtering low-quality cells, Drop-seq and DroNc-seq counts were aggregated (summed) for each  
657 gene, and the resulting counts were converted to log (TP10k + 1). The Pearson correlation between  
658 pseudo-bulk and each bulk RNA-seq sample was calculated using the *cor* function in *R 3.5.1* across  
659 ~6,000 genes.

660

### 661 Single-cell Trajectory Analysis

662 *Monocle* version 2.6.4 was used to construct single-cell differentiation trajectories. Computing the  
663 trajectory of approximately 20,000 cells is computationally expensive and slow with Monocle. To  
664 overcome this, we used the best 700 cells from each time-point. In particular, cells were ordered  
665 by their detection rate (number of genes detected) and 700 cells with the highest detection rate  
666 were chosen. The computation is also expensive and slow when the number of genes is high  
667 (>10,000 genes). Selection of genes for trajectory analysis, or feature selection, is critical for  
668 obtaining accurate trajectories. In our case, we used all of the differentially expressed genes in the  
669 cell type analysis. The data given to Monocle are log-transformed TP10k values. The  
670 *reduceDimension* function with the *DDRTree* method was used to obtain a 2-dimensional

671 representation of the developmental trajectories in each dataset. The cells were then ordered using  
672 the *orderCells* function, which infers the trajectory in reduced-dimension dataset using reserve  
673 graph embedding<sup>17</sup>. A total of 3,500 cells (700 per time-point, 5 time-points in total) were used to  
674 infer the trajectories in Drop-seq and DroNc-seq.

675

#### 676 Primary Heart Tissue Analysis

677 A total of 4796 nuclei obtained from post-mortem adult human male heart tissue were profiled  
678 using DroNc-seq. Genes were quantified using both introns and exons, with mean number of genes  
679 and UMIs of 361 and 823, respectively. The top 30% of cells were chosen based on number of  
680 genes detected, which corresponds to 1,491 cells. Transformation of data and cell type analysis  
681 was performed in the manner described above. Next, we calculated the Pearson correlation  
682 coefficient using the *cor* function in *R 3.5.1* between primary heart nuclei and the *in vitro* iPSC-  
683 derived CMs profiled by DroNc-seq. We also used iPSCs profiled by DroNc-seq as an out-group.  
684 A total of 200 iPSC-derived CMs and 50 iPSCs were used for the correlation analysis. For each  
685 primary heart nuclei, a total of 250 correlation coefficients were calculated using ~2500 genes,  
686 which we call the correlation profile of a cell. The resulting matrix of correlation values were  
687 visualized and bi-clustered with the *heatmap.2* function in *R 3.5.1*.

688

#### 689 **Data Availability**

690 All raw data are available through the Human Cell Atlas Portal  
691 (<https://prod.data.humancellatlas.org/explore/projects/c765e3f9-7cfc-4501-8832-79e5f7abd321>).  
692 All code used for analysis is available at [github.com/aselewa/czi](https://github.com/aselewa/czi) and [github.com/aselewa/  
693 dropseq\\_pipeline](https://github.com/aselewa/dropseq_pipeline).

694

#### 695 **Acknowledgement**

696 We thank Megan Rowton, Alex Guzzetta, and John Blischak for helpful comments on the  
697 manuscript. This work was supported by the Chan-Zuckerberg Initiative pilot award #2017-  
698 174052. RE was supported by the NIH MSTP Training Grant T32GM007281. KR was supported  
699 by NIH GRTG 5T32GM007197 and AHA Predoctoral Fellowship 18PRE34030197. SP was  
700 supported by the National Center for Advancing Translational Sciences of the NIH (K12  
701 HL119995). This work was performed, in part, at the Center for Nanoscale Materials, a U.S.  
702 Department of Energy Office of Science User Facility, and supported by the U.S. Department of  
703 Energy, Office of Science, under Contract No. DE-AC02-06CH11357.

#### 704 **Supplementary Methods**

705

##### 706 Species-mixing and single-cell specificity

707 For the Drop-seq experiment on biological replicate #1, chimpanzee iPSCs<sup>20</sup> were mixed with  
708 human iPSC-derived CMs from day 7 of the differentiation time-point, in order to assess the  
709 frequency of doublets during cell encapsulation. We used chimpanzee cells for the species mixing  
710 as these cells were grown using identical conditions as the human cells. The alignment protocol  
711 was adjusted so that each read was aligned to both the human genome (GRCh38) and the chimp  
712 genome (panTro5) separately. For each cell that passed quality control, we counted the number of  
713 reads that aligned exclusively or with a better score to the genome of one of the species (Figure  
714 S1). We then used the ratio of these counts as a ‘species-specificity’ score for each cell. We found  
715 only a small number of cells with scores that could suggest mixing of cells from human and chimp  
716 (< 5%), similar to previously reported estimates<sup>5</sup>. Cells with intermediate scores had typically

717 lower read counts and were thus removed by filtering based on read depth. We only kept cells with  
718 a specificity score above 0.6 yielding ~739 cells. In agreement with our assignment, > 99% of  
719 these cells were associated with clusters that we identified as CMs while none were associated  
720 with iPSC clusters.

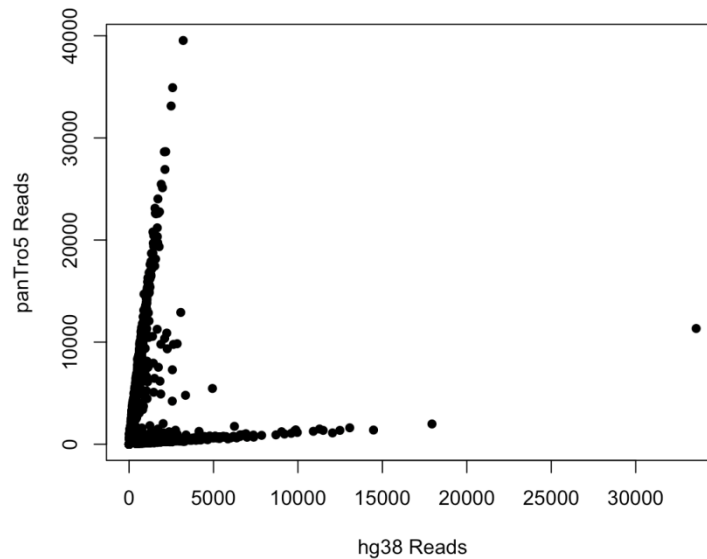

721  
722 Figure S1: Scatterplot of number of reads assigned to hg38 vs panTro5 for each cell in Drop-seq day 7, cell line #1 as  
723 part of a species-mixing experiment using human iPSC derived cardiomyocytes and chimpanzee iPSCs.  
724

725  
726

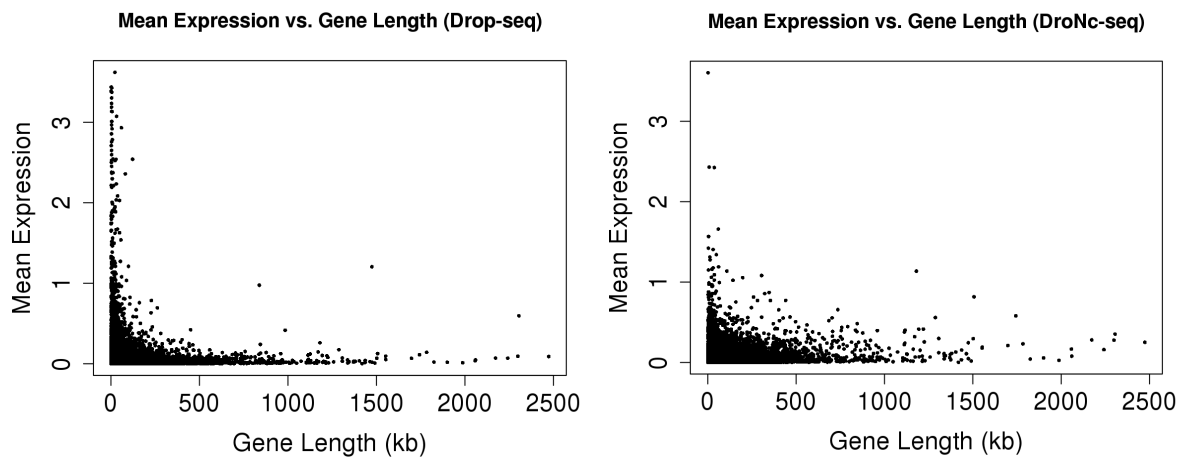

727  
728 Figure S2: Mean expression (log) vs. gene length for Drop-seq (left) and DroNc-seq (right).  
729

730  
731

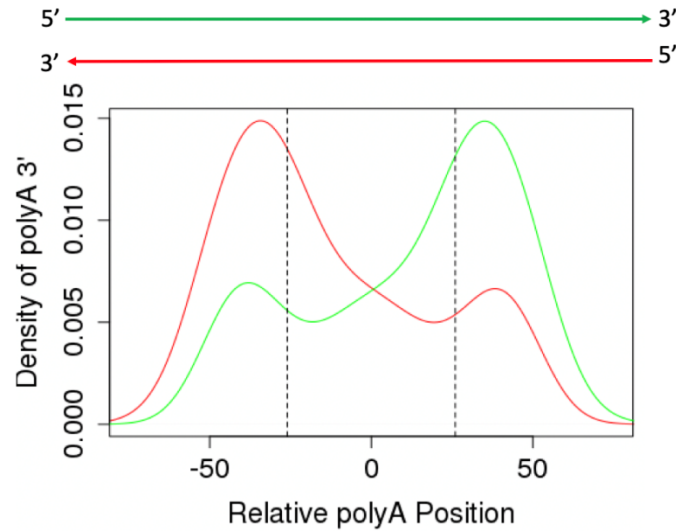

732  
733  
734  
735  
736

Figure S3: Density curves of the position of polyA at the 3' end. Green and red curves represent reads mapping to the forward and reverse direction, respectively. The dashed line represents the average read length.

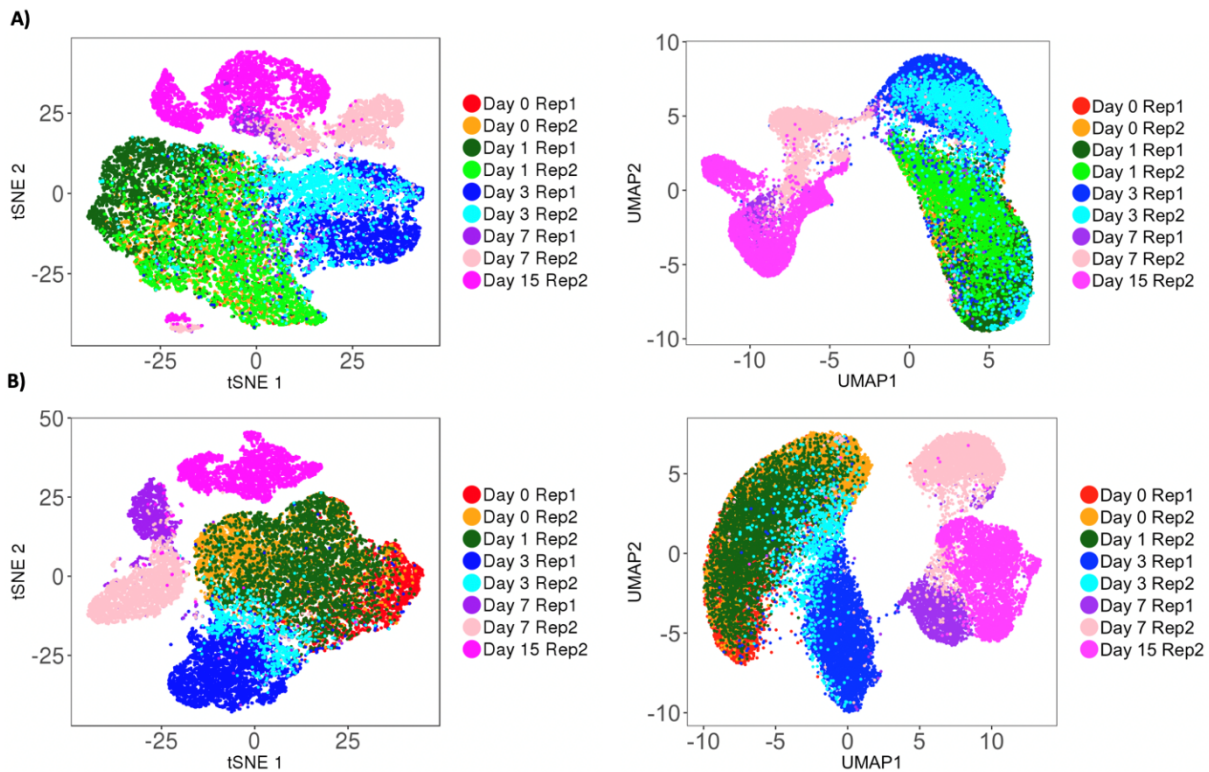

737  
738  
739  
740  
741  
742  
743  
744

Figure S4: Dimensionality reduction for A) Drop-seq and B) DroNc-seq using tSNE (left) and UMAP (right). Color represents the differentiation time point.



745

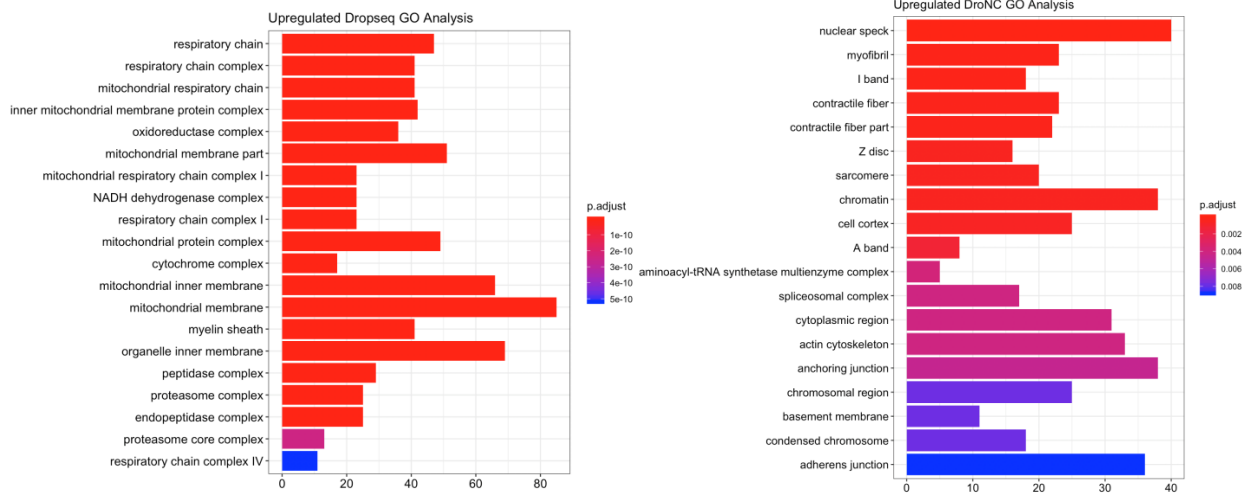

Figure S5: Gene enrichment analysis on differentially expressed genes between Drop-seq and DroNc-seq.

746  
747  
748  
749  
750  
751

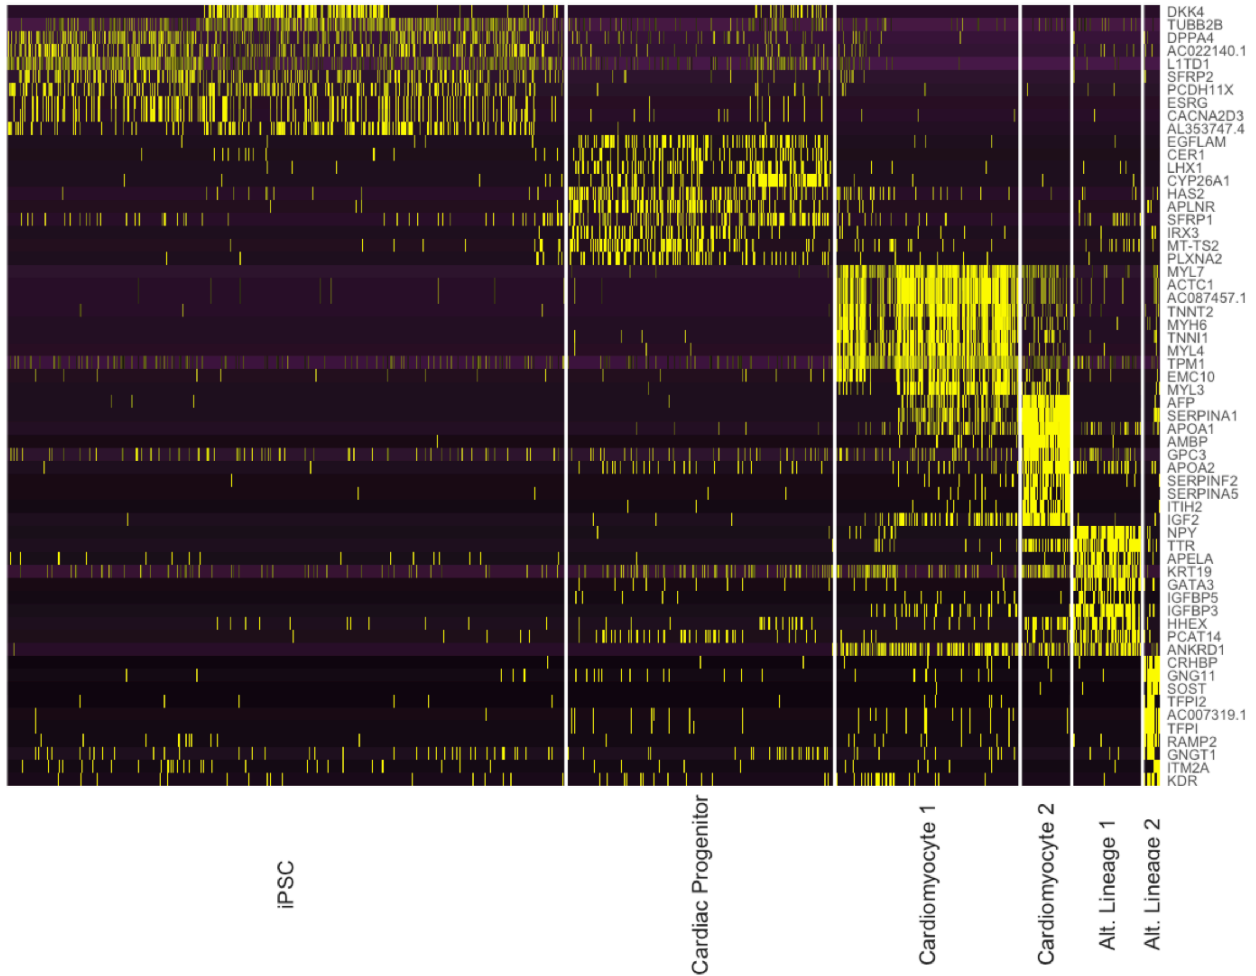

752

753 Figure S6: Heatmap of expression values of top 10 differentially expressed genes in each cell type cluster for Drop-  
 754 seq.  
 755  
 756

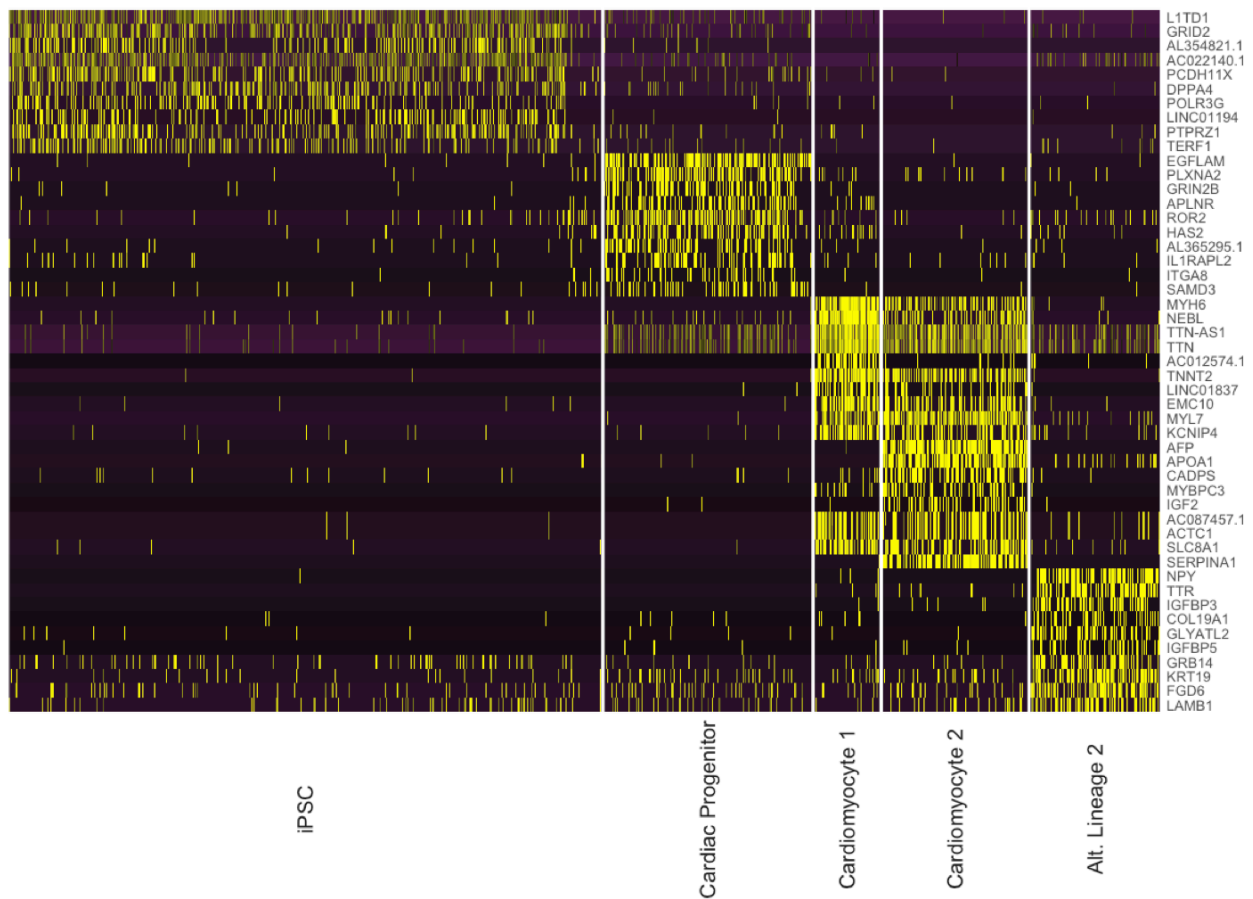

757 Figure S7: Heatmap of expression values of top 10 differentially expressed genes in each cell type cluster for DroNc-  
 758 seq.  
 759  
 760  
 761  
 762

Table S1: Breakdown of cell types and associated genes discovered in Drop-seq and DroNc-seq

| Markers        | Cell type          | Prevalence (Drop-seq) | Prevalence (DroNc-seq) | Drop-seq Only Genes (top 5)                 | DroNc-seq Only Genes (top 5)               |
|----------------|--------------------|-----------------------|------------------------|---------------------------------------------|--------------------------------------------|
| DPPA4          | iPSC               | 48.9%                 | 52%                    | SFRP2, AC025465.1, ESRG, CACNAD2D3, BDNF-AS | RIMS2, RPL8, GOLGA4, EIF4A2, SET           |
| EOMES<br>APLNR | Cardiac Progenitor | 23.3%                 | 18.2%                  | CER1, LHX1, CYP26A1, IRX3, MT-TS2           | GRIB2B, AL3365295.1, IL1RAPL2, KCNQ5, NRX3 |
| MYH6<br>TNNT2  | Cardiomyocyte 1    | 16.1%                 | 5.6%                   | MYL3, NPPA-AS1, NPPA,                       | AC012574.1, AC105233.5, MYO1D,             |

|                                  |                          |      |       |                                                    |                                                   |
|----------------------------------|--------------------------|------|-------|----------------------------------------------------|---------------------------------------------------|
|                                  |                          |      |       | ACTN2,<br>TNNC1                                    | ARHGAP42,<br>CDK14                                |
| MYH6<br>TNNT2<br>AFP<br>SERPINA1 | Cardiomyocyte 2          | 4.2% | 12.7% | AMBP,<br>APOA2,<br>SERPINF2,<br>ITIH2,<br>SERPINA5 | KCNH7,<br>ERBB4,<br>ZBTB20,<br>NRG3, KCNQ5        |
| TTR<br>FOXA2                     | Alternative<br>Lineage 1 | 5.9% | 11.3% | GATA3,<br>S100A14,<br>HHEX,<br>FLIRT3,<br>EPSTIL1  | EWSR1,<br>PTBP2,<br>ZMYM2,<br>LUC7L,<br>LINC01876 |
| CD34<br>SCARF1<br>FLT1           | Alternative<br>Lineage 2 | 1.4% | 0%    | CRHBP,<br>GNG11,<br>SOST, TFPI2,<br>AC007319.1     | None                                              |

763  
764  
765  
766  
767

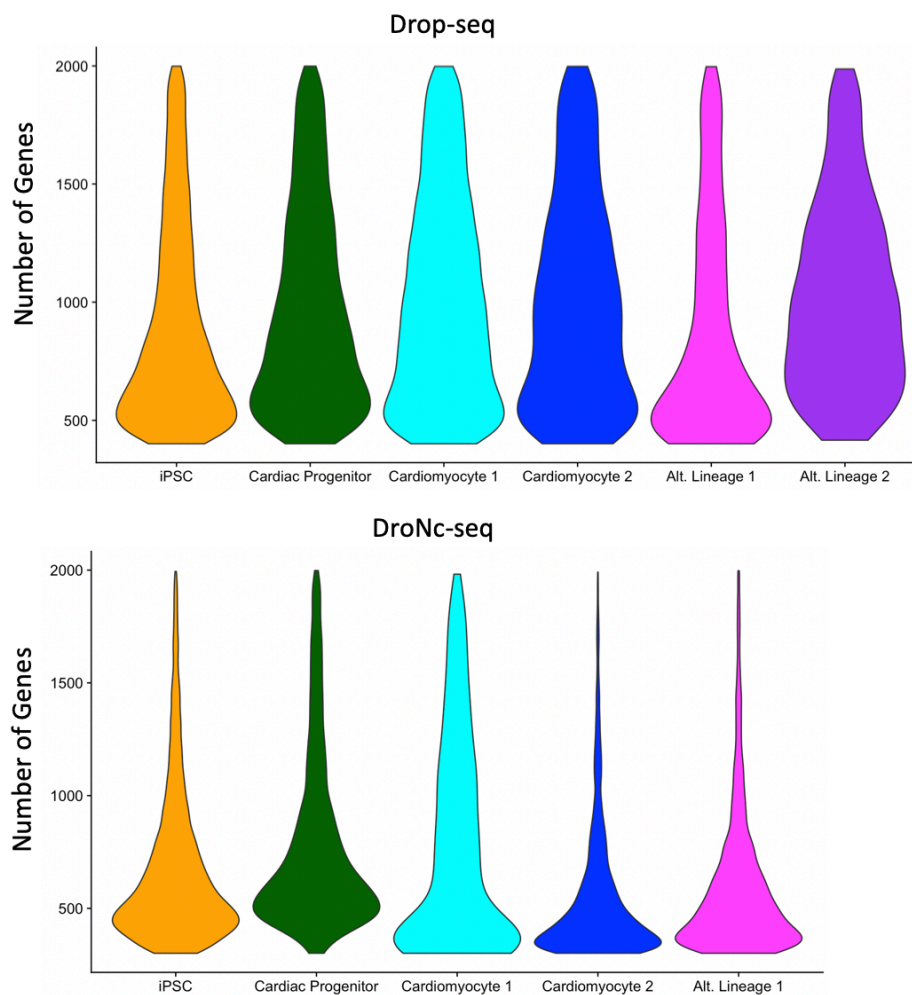

768  
769 Figure S8: Violin plots representing the of number of genes in each cluster for Drop-seq (top)  
770 and DroNc-seq (bottom).



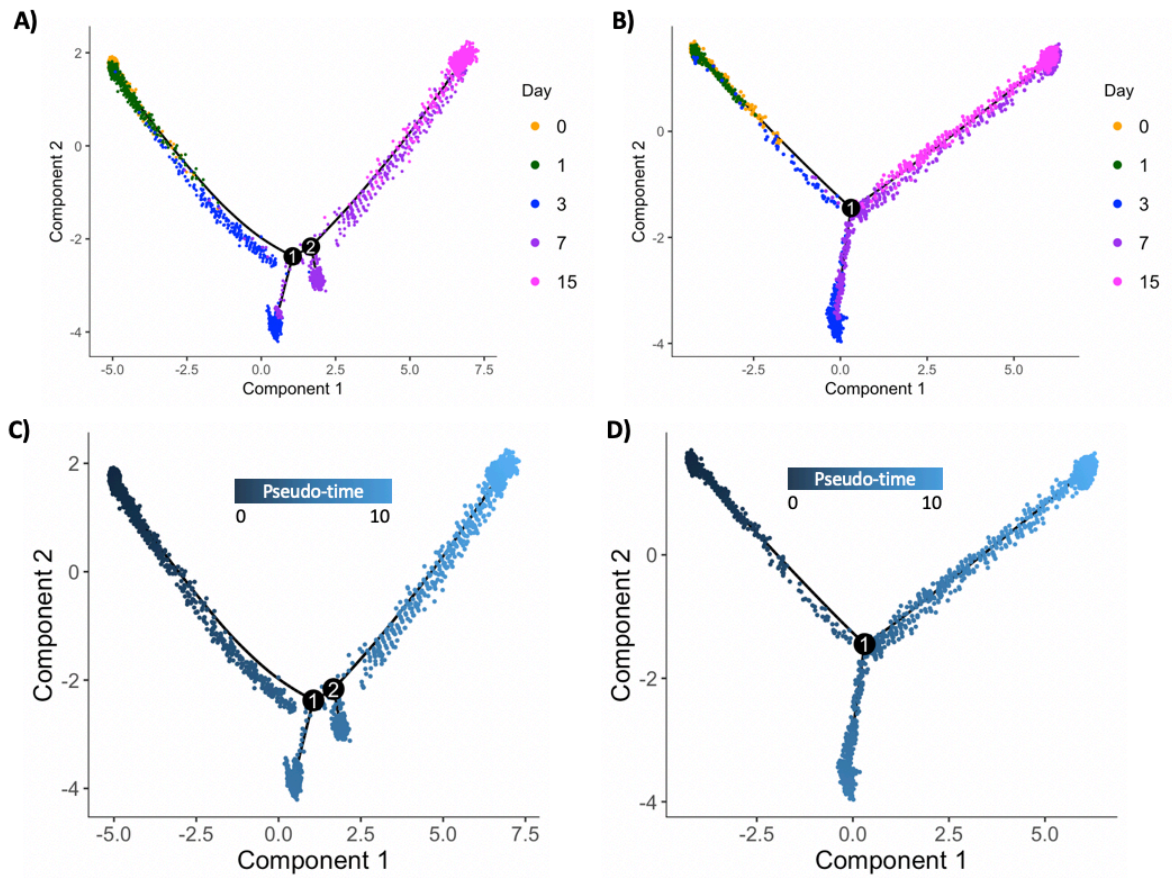

771  
772  
773  
774  
775

Figure S9: Cell differentiation trajectories constructed from Drop-seq (left), and DroNc-seq (right) using Monocle. Each differentiation time-point sampled is labelled by the same color in both techniques. A, B) uses the time-point as color, and C, D) shows the inferred pseudo-time as the color.

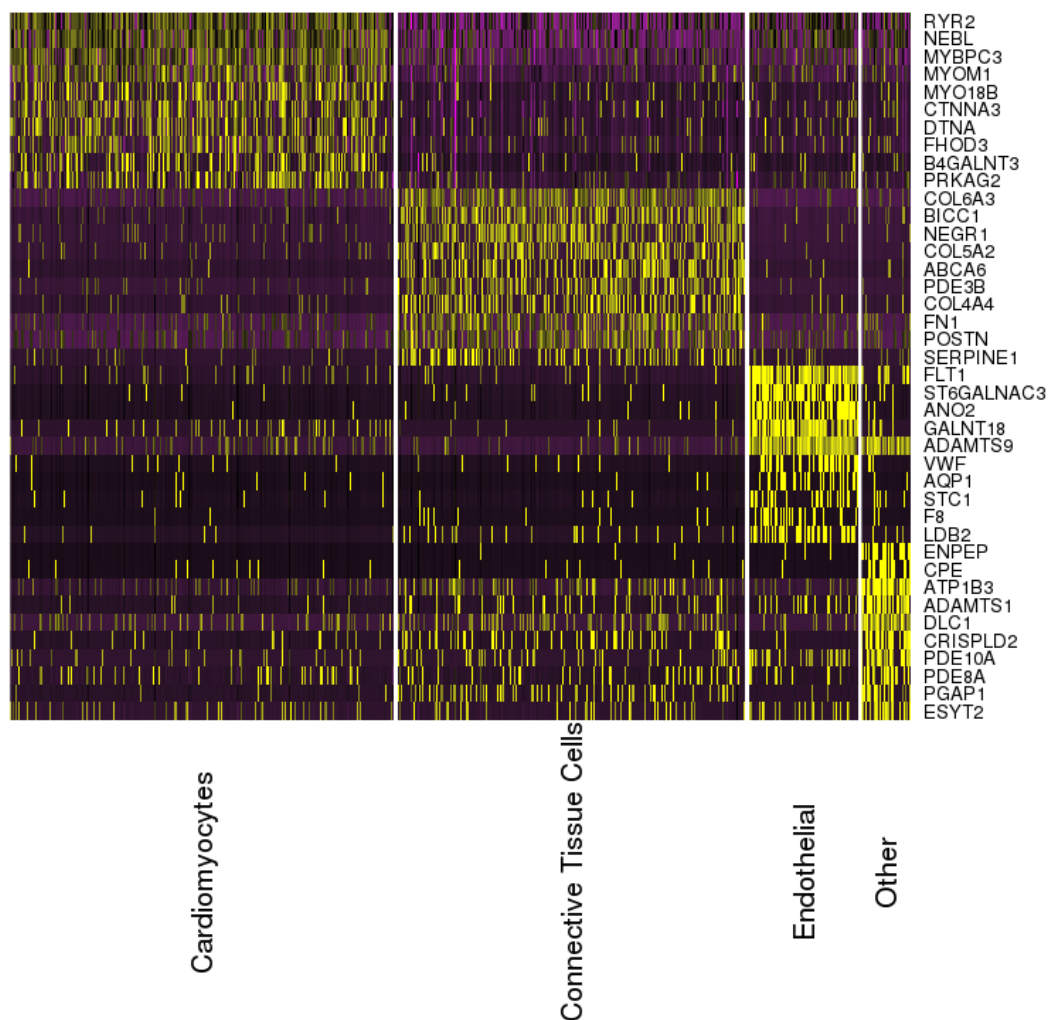

776  
777 Figure S10: Top 10 upregulated genes identified in each cell type cluster using DroNc-seq on primary tissue from  
778 archived adult human heart.  
779

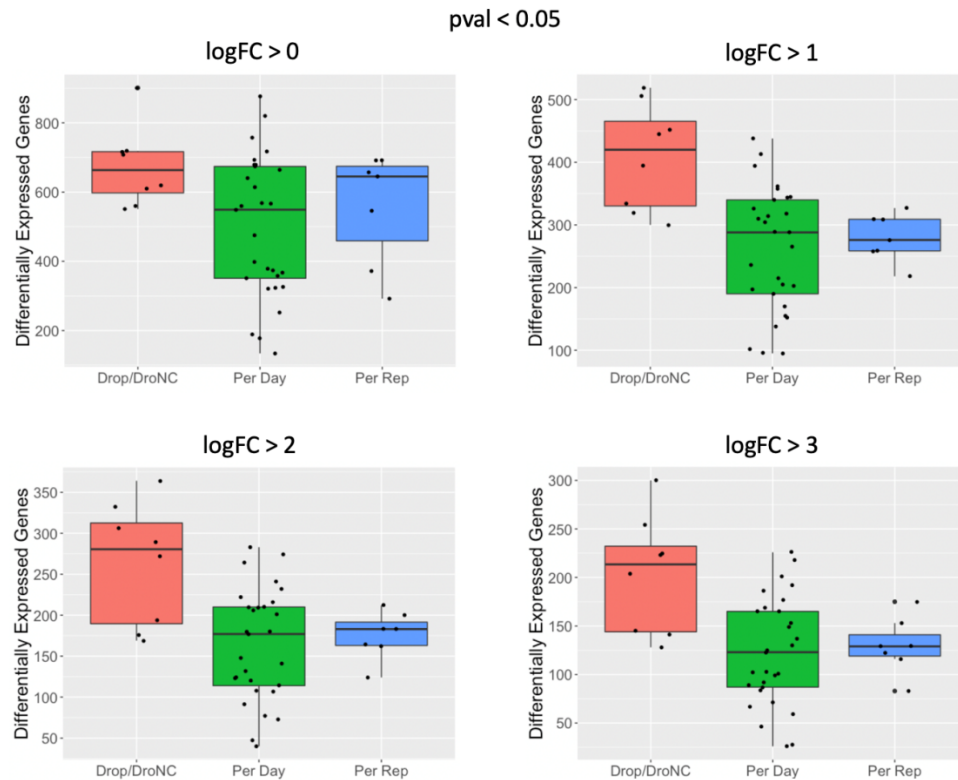

780  
781 Figure S11: Differential expression analysis across time-points, cell-lines (biological replicates), and across Drop-seq  
782 and DroNc-seq using different thresholds for log-fold-change. All genes shown have adjusted p-value < 0.05.  
783

784

785

786

787

788

789

790

791

792

793

794

795

796

797

798

799

800

801

802

803

804

805

806

807

808

809

810

References:

1. Rozenblatt-Rosen, O., Stubbington, M. J. T., Regev, A. & Teichmann, S. A. The Human Cell Atlas: From vision to reality. *Nature* (2017). doi:10.1038/550451a
2. Jaitin, D. A. *et al.* Massively parallel single-cell RNA-seq for marker-free decomposition of tissues into cell types. *Science* (80-. ). (2014). doi:10.1126/science.1247651
3. Shalek, A. K. *et al.* Single-cell transcriptomics reveals bimodality in expression and splicing in immune cells. *Nature* (2013). doi:10.1038/nature12172
4. Treutlein, B. *et al.* Reconstructing lineage hierarchies of the distal lung epithelium using single-cell RNA-seq. *Nature* (2014). doi:10.1038/nature13173
5. Macosko, E. Z. *et al.* Highly parallel genome-wide expression profiling of individual cells using nanoliter droplets. *Cell* **161**, 1202–1214 (2015).
6. Klein, A. M. *et al.* Droplet Barcoding for Single-Cell Transcriptomics Applied to Embryonic Stem Cells Accession Numbers GSE65525 Klein et al Resource Droplet Barcoding for Single-Cell Transcriptomics Applied to Embryonic Stem Cells. *Cell* (2015). doi:10.1016/j.cell.2015.04.044
7. Poran, A. *et al.* Single-cell RNA sequencing reveals a signature of sexual commitment in malaria parasites. *Nature* (2017). doi:10.1038/nature24280
8. Karaiskos, N. *et al.* The Drosophila embryo at single-cell transcriptome resolution. *Science* (80-. ). (2017). doi:10.1126/science.aan3235
9. Habib, N. *et al.* Massively parallel single-nucleus RNA-seq with DroNc-seq. *Nat. Methods* **14**, 955–958 (2017).
10. Lake, B. B. *et al.* A comparative strategy for single-nucleus and single-cell transcriptomes confirms accuracy in predicted cell-type expression from nuclear RNA. *Sci. Rep.* (2017). doi:10.1038/s41598-017-04426-w
11. Bakken, T. E. *et al.* Single-nucleus and single-cell transcriptomes compared in matched cortical cell types. *PLoS One* (2018). doi:10.1371/journal.pone.0209648

- 811 12. Wu, H., Kirita, Y., Donnelly, E. L. & Humphreys, B. D. Advantages of Single-Nucleus over Single-Cell  
812 RNA Sequencing of Adult Kidney: Rare Cell Types and Novel Cell States Revealed in Fibrosis. *J. Am. Soc.*  
813 *Nephrol.* (2018). doi:10.1681/asn.2018090912
- 814 13. Banovich, N. E. *et al.* Impact of regulatory variation across human iPSCs and differentiated cells. *Genome*  
815 *Res.* **28**, 1243–1252 (2017).
- 816 14. La Manno, G. *et al.* RNA velocity of single cells. *Nature* (2018). doi:10.1038/s41586-018-0414-6
- 817 15. Butler, A., Hoffman, P., Smibert, P., Papalexi, E. & Satija, R. Integrating single-cell transcriptomic data  
818 across different conditions, technologies, and species. *Nat. Biotechnol.* (2018). doi:10.1038/nbt.4096
- 819 16. Friedman, C. E. *et al.* Single-Cell Transcriptomic Analysis of Cardiac Differentiation from Human PSCs  
820 Reveals HOPX-Dependent Cardiomyocyte Maturation. *Cell Stem Cell* (2018).  
821 doi:10.1016/j.stem.2018.09.009
- 822 17. Pavlovic, B. J., Blake, L. E., Roux, J., Chavarria, C. & Gilad, Y. A Comparative Assessment of Human and  
823 Chimpanzee iPSC-derived Cardiomyocytes with Primary Heart Tissues. *Sci. Rep.* (2018).  
824 doi:10.1038/s41598-018-33478-9
- 825 18. Setty, M. *et al.* Wishbone identifies bifurcating developmental trajectories from single-cell data. *Nat.*  
826 *Biotechnol.* (2016). doi:10.1038/nbt.3569
- 827 19. Trapnell, C. *et al.* The dynamics and regulators of cell fate decisions are revealed by pseudotemporal  
828 ordering of single cells. *Nat. Biotechnol.* (2014). doi:10.1038/nbt.2859
- 829 20. Romero, I. G. *et al.* A panel of induced pluripotent stem cells from chimpanzees: A resource for  
830 comparative functional genomics. *Elife* (2015). doi:10.7554/eLife.07103.001
- 831 21. Köster, J. & Rahmann, S. Snakemake—a scalable bioinformatics workflow engine. *Bioinformatics* (2012).  
832 doi:10.1093/bioinformatics/bts480
- 833 22. Andrews, S. & Babraham Bioinformatics. FastQC: A quality control tool for high throughput sequence data.  
834 *Manual* (2010). doi:citeulike-article-id:11583827
- 835 23. Smith, T., Heger, A. & Sudbery, I. UMI-tools: Modeling sequencing errors in Unique Molecular Identifiers  
836 to improve quantification accuracy. *Genome Res.* (2017). doi:10.1101/gr.209601.116
- 837 24. Martin, M. Cutadapt removes adapter sequences from high-throughput sequencing reads. *EMBnet.journal*  
838 (2011). doi:10.14806/ej.17.1.200
- 839 25. Dobin, A. *et al.* STAR: Ultrafast universal RNA-seq aligner. *Bioinformatics* (2013).  
840 doi:10.1093/bioinformatics/bts635
- 841 26. Liao, Y., Smyth, G. K. & Shi, W. FeatureCounts: An efficient general purpose program for assigning  
842 sequence reads to genomic features. *Bioinformatics* (2014). doi:10.1093/bioinformatics/btt656
- 843 27. Bailey, T. L. *et al.* MEME Suite: Tools for motif discovery and searching. *Nucleic Acids Res.* (2009).  
844 doi:10.1093/nar/gkp335
- 845 28. McInnes, L., Healy, J., Saul, N. & Großberger, L. UMAP: Uniform Manifold Approximation and  
846 Projection. *J. Open Source Softw.* (2018). doi:10.21105/joss.00861
- 847 29. Etienne, B. *et al.* Evaluation of UMAP as an alternative to t-SNE for single-cell data. *Development* (2018).  
848 doi:10.1101/298430
- 849 30. Soneson, C. & Robinson, M. D. Bias, robustness and scalability in single-cell differential expression  
850 analysis. *Nat. Methods* (2018). doi:10.1038/nmeth.4612
- 851
